# Supplementary material for: Reaching Elimination of Onchocerciasis Transmission with Long-term Vector Control and Ivermectin Treatment in West Africa: The Example of Togo
Source: Research Square preprint supplement (doi:10.21203/rs.3.rs-6284820/v1), 2025-04-07
Supplement: Supplementary file 2 [file 812405c2d56f2938b399f7a5.pdf]

# Supplementary Material 2: Modelled probabilities of elimination of transmission

## Reaching Elimination of Onchocerciasis Transmission with Long-term Vector Control and Ivermectin Treatment in West Africa: The Example of Togo

Luís-Jorge Amaral<sup>1,2</sup>, Rachel N. Bronzan<sup>3,4</sup>, Anders Seim<sup>5</sup>, Marie-Denise Milord<sup>3</sup>, Koffi Padjoudoum<sup>6</sup>, Ibrahim Gado Telou<sup>7</sup>, Sibabe Agoro<sup>7</sup>, Michel Datagni<sup>8</sup>, Piham Gnossike<sup>9</sup>, Jonathan I. D. Hamley<sup>1,10</sup>, Martin Walker<sup>1,11</sup>, Maria-Gloria Basáñez<sup>1</sup>

<sup>1</sup> MRC Centre for Global Infectious Disease Analysis and London Centre for Neglected Tropical Disease Research, Department of Infectious Disease Epidemiology, School of Public Health, Imperial College London, London, UK

<sup>2</sup> Global Health Institute, University of Antwerp, Antwerp, Belgium

<sup>3</sup> Health & Development International, Newburyport, Massachusetts, USA

<sup>4</sup> Gates Foundation, Seattle, Washington, USA

<sup>5</sup> Health & Development International, Fjellstrand, Norway

<sup>6</sup> National Onchocerciasis Control Program, Kara, Togo

<sup>7</sup> Ministère de la Santé et de l'Hygiène Publique, Lomé, Togo

<sup>8</sup> Health and Development International, Lomé, Togo

<sup>9</sup> Neglected Tropical Diseases Coordinator, Ministère de la Santé et de l'Hygiène Publique, Lomé, Togo

<sup>10</sup> Department of Visceral Surgery and Medicine, and Multidisciplinary Center for Infectious Diseases, University of Bern, Switzerland

<sup>11</sup> Department of Pathobiology and Population Sciences, Royal Veterinary College, Hatfield, UK

Corresponding author: María-Gloria Basáñez ([m.basanez@imperial.ac.uk](mailto:m.basanez@imperial.ac.uk))

Alternative corresponding author: Luís-Jorge Amaral ([luis.amaral20@imperial.ac.uk](mailto:luis.amaral20@imperial.ac.uk))

# Table of Contents

|                                                                                                                                                                                                                                                               |           |
|---------------------------------------------------------------------------------------------------------------------------------------------------------------------------------------------------------------------------------------------------------------|-----------|
| <b>Projected probabilities of elimination of onchocerciasis transmission</b>                                                                                                                                                                                  | <b>4</b>  |
| <b>Table S7.</b> Probability of elimination of onchocerciasis transmission (EOT) when simulating that ivermectin mass drug administration (MDA) stops in 2024, 2027 or 2030 per modelled (minimal, reference and enhanced) intervention scenarios in Savanes  | 4         |
| <b>Table S7.</b> Continued                                                                                                                                                                                                                                    | 5         |
| <b>Table S8.</b> Probability of elimination of onchocerciasis transmission (EOT) when simulating that ivermectin mass drug administration (MDA) stops in 2024, 2027 or 2030 per modelled (minimal, reference and enhanced) intervention scenarios in Kara     | 6         |
| <b>Table S9.</b> Probability of elimination of onchocerciasis transmission (EOT) when simulating that ivermectin mass drug administration (MDA) stops in 2024, 2027 or 2030 per modelled (minimal, reference and enhanced) intervention scenarios in Centrale | 7         |
| <b>Table S10.</b> Probability of elimination of onchocerciasis transmission (EOT) when simulating that ivermectin mass drug administration (MDA) stops in 2024, 2027 or 2030 per modelled (minimal, reference and enhanced) intervention scenario in Plateaux | 8         |
| <b>Table S11.</b> Probability of elimination of onchocerciasis transmission (EOT) when simulating that ivermectin mass drug administration (MDA) stops in 2014 or 2020 per modelled (minimal, reference and enhanced) intervention scenario in Maritime       | 9         |
| <b>Table S12.</b> Probability of elimination of onchocerciasis transmission (EOT) when simulating that ivermectin mass drug administration (MDA) stops in 2024, 2027 or 2030 per modelled (minimal, reference and enhanced) intervention scenario in Maritime | 10        |
| <b>Text S8. Villages projected not to reach elimination of onchocerciasis transmission (EOT) if ivermectin MDA stops in 2027, per region and special intervention zone (SIZ) status</b>                                                                       | <b>11</b> |
| <i>S8.1. Villages with recorded baseline microfilarial prevalence estimates (with BMP)</i>                                                                                                                                                                    | <i>11</i> |
| <b>Table S13.</b> Villages in Savanes not included in the special intervention zone (non-SIZ)                                                                                                                                                                 | 11        |
| <b>Table S14.</b> Villages in Kara included in the special intervention zone (SIZ)                                                                                                                                                                            | 12        |
| <b>Table S15.</b> Villages in Centrale included in the special intervention zone (SIZ)                                                                                                                                                                        | 12        |
| <b>Table S16.</b> Villages in Centrale not included in the special intervention zone (non-SIZ)                                                                                                                                                                | 13        |
| <b>Table S17.</b> Villages in Plateaux not included in the special intervention zone (non-SIZ)                                                                                                                                                                | 14        |
| <b>Table S17.</b> Continued                                                                                                                                                                                                                                   | 15        |
| <b>Table S17.</b> Continued                                                                                                                                                                                                                                   | 16        |
| <b>Table S18.</b> Villages in Maritime not included in the special intervention zone (non-SIZ)                                                                                                                                                                | 17        |
| <i>S8.2. Villages without recorded baseline microfilarial prevalence estimates (without BMP)</i>                                                                                                                                                              | <i>18</i> |
| <b>Table S19.</b> Villages in Savanes included in the special intervention zone (SIZ)                                                                                                                                                                         | 18        |
| <b>Table S19.</b> Continued                                                                                                                                                                                                                                   | 19        |
| <b>Table S20.</b> Villages in Kara included in the special intervention zone (SIZ)                                                                                                                                                                            | 20        |
| <b>Table S20.</b> Continued                                                                                                                                                                                                                                   | 21        |
| <b>Table S21.</b> Villages in Centrale included in the special intervention zone (SIZ)                                                                                                                                                                        | 22        |
| <b>Table S22.</b> Villages in Centrale not included in the special intervention zone (non-SIZ)                                                                                                                                                                | 23        |
| <b>Table S23.</b> Villages in Plateaux not included in the special intervention zone (non-SIZ)                                                                                                                                                                | 24        |
| <b>Table S23.</b> Continued                                                                                                                                                                                                                                   | 25        |
| <b>Table S23.</b> Continued                                                                                                                                                                                                                                   | 26        |
| <b>Table S24.</b> Villages in Maritime not included in the special intervention zone (non-SIZ)                                                                                                                                                                | 27        |

|                                                                                                                           |           |
|---------------------------------------------------------------------------------------------------------------------------|-----------|
| <b>Text S9. Calculation of prefecture-level likelihood of reaching elimination of onchocerciasis transmission</b>         | <b>28</b> |
| <b>Table S25.</b> Assigned midpoint values for village-level EOT probability ranges                                       | 28        |
| <b>Table S26.</b> Definitions of prefecture-level EOT likelihood categories                                               | 29        |
| <b>Table S27.</b> Prefecture-level likelihood of reaching EOT when simulating that ivermectin MDA stops in 2024           | 30        |
| <b>Table S27.</b> Continued                                                                                               | 31        |
| <b>Table S27.</b> Continued                                                                                               | 32        |
| <b>Table S28.</b> Prefecture-level likelihood of reaching EOT when simulating that ivermectin MDA stops in 2027           | 33        |
| <b>Table S28.</b> Continued                                                                                               | 34        |
| <b>Table S28.</b> Continued                                                                                               | 35        |
| <b>Table S29.</b> Prefecture-level likelihood of reaching EOT when simulating that ivermectin MDA stops in 2030           | 36        |
| <b>Table S29.</b> Continued                                                                                               | 37        |
| <b>Table S29.</b> Continued                                                                                               | 38        |
| <b>Reported ivermectin treatment coverage of total population (%) per region and prefecture from 1991 to 2018 in Togo</b> | <b>39</b> |
| <b>Table S30.</b> Reported coverage (% of total population) of ivermectin MDA for 1991-2018 in Savanes                    | 39        |
| <b>Table S31.</b> Reported coverage (% of total population) of ivermectin MDA for 1991-2018 in Kara                       | 40        |
| <b>Table S32.</b> Reported coverage (% of total population) of ivermectin MDA for 1991-2018 in Centrale                   | 41        |
| <b>Table S33.</b> Reported coverage (% of total population) of ivermectin MDA for 1991-2018 in Plateaux                   | 42        |
| <b>Table S34.</b> Reported coverage (% of total population) of ivermectin MDA for 1991-2018 in Maritime                   | 43        |
| <b>Supplementary references</b>                                                                                           | <b>44</b> |

## Projected probabilities of elimination of onchocerciasis transmission

**Table S7. Probability of elimination of onchocerciasis transmission (EOT) when simulating that ivermectin mass drug administration (MDA) stops in 2024, 2027 or 2030 per modelled (minimal, reference and enhanced) intervention scenarios in Savanes**

| Region and SIZ status<br><br>• Interventions                                                                | Modelled baseline endemicity | Probability of elimination of transmission (EOT, %) <sup>a</sup><br>(Number of villages following the scenario, with (BMP) or without (No BMP) recorded baseline microfilarial prevalence) |                       |                                  |                   |                                  |                        |                  |                       |                        |
|-------------------------------------------------------------------------------------------------------------|------------------------------|--------------------------------------------------------------------------------------------------------------------------------------------------------------------------------------------|-----------------------|----------------------------------|-------------------|----------------------------------|------------------------|------------------|-----------------------|------------------------|
|                                                                                                             |                              | 2024                                                                                                                                                                                       |                       |                                  | 2027              |                                  |                        | 2030             |                       |                        |
|                                                                                                             |                              | Minimal                                                                                                                                                                                    | Reference             | Enhanced                         | Minimal           | Reference                        | Enhanced               | Minimal          | Reference             | Enhanced               |
| Savanes SIZ<br><br>• VC 1977-1993<br>• Annual MDA 1991-2002<br>• Biannual MDA from 2003                     | Hypoendemic                  | ≥90<br>(1 BMP; 14 No BMP)                                                                                                                                                                  |                       |                                  |                   |                                  |                        |                  |                       |                        |
|                                                                                                             | Mesoendemic                  |                                                                                                                                                                                            |                       |                                  |                   |                                  |                        |                  |                       |                        |
|                                                                                                             | Hyperendemic                 | <5<br>(3 No BMP)                                                                                                                                                                           | 20 – 59<br>(4 No BMP) | 60 – 89<br>(10 No BMP)           | <5<br>(3 No BMP)  | 20 – 59<br>(4 No BMP)            | 60 – 89<br>(10 No BMP) | <5<br>(3 No BMP) | 20 – 59<br>(4 No BMP) | 60 – 89<br>(10 No BMP) |
| Savanes SIZ<br><br>• VC 1977-1993 (100%) <sup>a</sup><br>• Annual MDA 1991-2002<br>• Biannual MDA from 2003 | Hypoendemic                  | ≥90<br>(3 BMP; 14 No BMP)                                                                                                                                                                  |                       |                                  |                   |                                  |                        |                  |                       |                        |
|                                                                                                             | Mesoendemic                  |                                                                                                                                                                                            |                       |                                  |                   |                                  |                        |                  |                       |                        |
|                                                                                                             | Hyperendemic                 | 60 – 89<br>(3 No BMP)                                                                                                                                                                      | ≥90<br>(1 No BMP)     | 60 – 89<br>(3 No BMP)            | ≥90<br>(1 No BMP) | 60 – 89<br>(3 No BMP)            | ≥90<br>(1 No BMP)      |                  |                       |                        |
| Savanes non-SIZ<br><br>• VC 1977-1993<br>• Annual MDA from 1991                                             | Hypoendemic                  | ≥90<br>(2 No BMP; 3 BMP <sup>b</sup> )                                                                                                                                                     |                       |                                  |                   |                                  |                        |                  |                       |                        |
|                                                                                                             | Mesoendemic                  | 60 – 89<br>(1 BMP <sup>b</sup> )                                                                                                                                                           | ≥90<br>(1 BMP)        | 60 – 89<br>(1 BMP <sup>b</sup> ) | ≥90<br>(1 BMP)    | 60 – 89<br>(1 BMP <sup>b</sup> ) | ≥90<br>(1 BMP)         |                  |                       |                        |
|                                                                                                             | Hyperendemic                 | <5<br>(0)                                                                                                                                                                                  |                       |                                  |                   |                                  |                        |                  |                       |                        |

Table S7. Continued

| Region and SIZ status<br>• Interventions                                            | Modelled baseline endemicity | Probability of elimination of transmission (EOT, %) <sup>a</sup><br>(Number of villages following the scenario, with (BMP) or without (No BMP) recorded baseline microfilarial prevalence) |                |            |                                            |                |            |                                            |                |            |
|-------------------------------------------------------------------------------------|------------------------------|--------------------------------------------------------------------------------------------------------------------------------------------------------------------------------------------|----------------|------------|--------------------------------------------|----------------|------------|--------------------------------------------|----------------|------------|
|                                                                                     |                              | 2024                                                                                                                                                                                       |                |            | 2027                                       |                |            | 2030                                       |                |            |
|                                                                                     |                              | Minimal                                                                                                                                                                                    | Reference      | Enhanced   | Minimal                                    | Reference      | Enhanced   | Minimal                                    | Reference      | Enhanced   |
| Savanes non-SIZ<br><br>• VC 1977-1993 (100%) <sup>a</sup><br>• Annual MDA from 1991 | Hypoendemic                  | ≥90<br>(0)                                                                                                                                                                                 |                |            |                                            |                |            |                                            |                |            |
|                                                                                     | Mesoendemic                  |                                                                                                                                                                                            |                |            |                                            |                |            |                                            |                |            |
|                                                                                     | Hyperendemic                 | 20 – 59<br>(2 No BMP;<br>1 BMP <sup>b</sup> )                                                                                                                                              | 60 – 89<br>(0) | ≥90<br>(0) | 20 – 59<br>(2 BMP;<br>1 BMP <sup>b</sup> ) | 60 – 89<br>(0) | ≥90<br>(0) | 20 – 59<br>(2 BMP;<br>1 BMP <sup>b</sup> ) | 60 – 89<br>(0) | ≥90<br>(0) |

<sup>a</sup>Probability of elimination of onchocerciasis transmission simulated as the proportion (%) of 100 model runs for each baseline endemicity level and intervention scenario with 0% microfilarial prevalence 50 years after stopping ivermectin MDA.

<sup>b</sup>Village from preparatory surveys prior to the commencement of the OCP [1,2] (not in OCP database).

BMP, baseline microfilarial prevalence; EOT, elimination of transmission; MDA, mass drug administration with ivermectin; SIZ, special intervention zone; VC, vector control by aerial larviciding of breeding sites. <sup>a</sup>100% vector control efficacy [3].

**Table S8. Probability of elimination of onchocerciasis transmission (EOT) when simulating that ivermectin mass drug administration (MDA) stops in 2024, 2027 or 2030 per modelled (minimal, reference and enhanced) intervention scenarios in Kara**

| Region and SIZ status<br>• Interventions                                             | Modelled baseline endemicity | Probability of elimination of transmission (EOT, %) <sup>a</sup><br>(Number of villages following the scenario, with (BMP) or without (No BMP) recorded baseline microfilarial prevalence) |                                                         |                                 |                                    |                                                         |                             |                                     |                                                         |                             |
|--------------------------------------------------------------------------------------|------------------------------|--------------------------------------------------------------------------------------------------------------------------------------------------------------------------------------------|---------------------------------------------------------|---------------------------------|------------------------------------|---------------------------------------------------------|-----------------------------|-------------------------------------|---------------------------------------------------------|-----------------------------|
|                                                                                      |                              | 2024                                                                                                                                                                                       |                                                         |                                 | 2027                               |                                                         |                             | 2030                                |                                                         |                             |
|                                                                                      |                              | Minimal                                                                                                                                                                                    | Reference                                               | Enhanced                        | Minimal                            | Reference                                               | Enhanced                    | Minimal                             | Reference                                               | Enhanced                    |
| Kara SIZ<br><br>• VC 1977-2007<br>• Annual MDA 1991-2002<br>• Biannual MDA from 2003 | Hypoendemic                  | ≥90<br>(4 BMP; 2 BMP <sup>b</sup> ; 42 No BMP)                                                                                                                                             |                                                         |                                 |                                    |                                                         |                             |                                     |                                                         |                             |
|                                                                                      | Mesoendemic                  |                                                                                                                                                                                            |                                                         |                                 |                                    |                                                         |                             |                                     |                                                         |                             |
|                                                                                      | Hyperendemic                 | 5 – 19<br>(2 BMP;<br>11 No<br>BMP)                                                                                                                                                         | 20 – 59<br>(2 BMP;<br>1 BMP <sup>b</sup> ;<br>5 No BMP) | 60 – 89<br>(2 BMP;<br>2 No BMP) | 5 – 19<br>(2 BMP;<br>11 No<br>BMP) | 60 – 89<br>(2 BMP;<br>1 BMP <sup>b</sup> ;<br>5 No BMP) | ≥90<br>(2 BMP;<br>2 No BMP) | 20 – 59<br>(2 BMP;<br>11 No<br>BMP) | 60 – 89<br>(2 BMP;<br>1 BMP <sup>b</sup> ;<br>5 No BMP) | ≥90<br>(2 BMP;<br>2 No BMP) |
|                                                                                      | Holoendemic                  | <5%<br>(2 BMP; 13 No BMP)                                                                                                                                                                  |                                                         |                                 |                                    |                                                         |                             |                                     |                                                         |                             |

<sup>a</sup>Probability of elimination of onchocerciasis transmission simulated as the proportion (%) of 100 model runs for each baseline endemicity level and intervention scenario with 0% microfilarial prevalence 50 years after stopping ivermectin MDA.

<sup>b</sup>Village from preparatory surveys prior to the commencement of the OCP [1,2] (not in OCP database).

BMP, baseline microfilarial prevalence; EOT, elimination of transmission; MDA, mass drug administration with ivermectin; SIZ, special intervention zone; VC, vector control by aerial larviciding of breeding sites.

**Table S9. Probability of elimination of onchocerciasis transmission (EOT) when simulating that ivermectin mass drug administration (MDA) stops in 2024, 2027 or 2030 per modelled (minimal, reference and enhanced) intervention scenarios in Centrale**

| Region and SIZ status<br>• Interventions                                                 | Modelled baseline endemicity | Probability of elimination of transmission (EOT, %) <sup>a</sup><br>(Number of villages following the scenario, with (BMP) or without (No BMP) recorded baseline microfilarial prevalence) |                              |                                 |                                     |                              |                             |                                     |                              |                             |
|------------------------------------------------------------------------------------------|------------------------------|--------------------------------------------------------------------------------------------------------------------------------------------------------------------------------------------|------------------------------|---------------------------------|-------------------------------------|------------------------------|-----------------------------|-------------------------------------|------------------------------|-----------------------------|
|                                                                                          |                              | 2024                                                                                                                                                                                       |                              |                                 | 2027                                |                              |                             | 2030                                |                              |                             |
|                                                                                          |                              | Minimal                                                                                                                                                                                    | Reference                    | Enhanced                        | Minimal                             | Reference                    | Enhanced                    | Minimal                             | Reference                    | Enhanced                    |
| Centrale SIZ<br><br>• VC 1977-2007<br>• Annual MDA 1991-2002<br>• Biannual MDA from 2003 | Hypoendemic                  | ≥90<br>(1 No BMP)                                                                                                                                                                          |                              |                                 |                                     |                              |                             |                                     |                              |                             |
|                                                                                          | Mesoendemic                  |                                                                                                                                                                                            |                              |                                 |                                     |                              |                             |                                     |                              |                             |
|                                                                                          | Hyperendemic                 | 5 – 19<br>(1 BMP;<br>3 No BMP)                                                                                                                                                             | 60 – 89<br>(3 No<br>BMP)     | 60 – 89<br>(1 BMP;<br>1 No BMP) | 5 – 19<br>(1 BMP;<br>3 No BMP)      | 60 – 89<br>(3 No<br>BMP)     | ≥90<br>(1 BMP;<br>1 No BMP) | 20 – 59<br>(1 BMP;<br>3 No BMP)     | 60 – 89<br>(3 No<br>BMP)     | ≥90<br>(1 BMP;<br>1 No BMP) |
|                                                                                          | Holoendemic                  | <5<br>(6 No BMP)                                                                                                                                                                           |                              |                                 |                                     |                              |                             |                                     |                              |                             |
| Centrale non-SIZ<br><br>• VC 1989-2002<br>• Annual MDA from 1991                         | Hypoendemic                  | ≥90<br>(13 BMP; 8 No BMP)                                                                                                                                                                  |                              |                                 |                                     |                              |                             |                                     |                              |                             |
|                                                                                          | Mesoendemic                  | 60 – 89<br>(8 BMP;<br>11 No<br>BMP)                                                                                                                                                        | ≥90<br>(18 BMP; 2 No BMP)    |                                 | 60 – 89<br>(8 BMP;<br>11 No<br>BMP) | ≥90<br>(18 BMP; 2 No BMP)    |                             | 60 – 89<br>(8 BMP;<br>11 No<br>BMP) | ≥90<br>(18 BMP; 2 No BMP)    |                             |
|                                                                                          | Hyperendemic                 | <5<br>(2 No<br>BMP)                                                                                                                                                                        | 60 – 89<br>(5 BMP; 3 No BMP) |                                 | <5<br>(2 No<br>BMP)                 | 60 – 89<br>(5 BMP; 3 No BMP) |                             | <5<br>(2 No<br>BMP)                 | 60 – 89<br>(5 BMP; 3 No BMP) |                             |

<sup>a</sup>Probability of elimination of onchocerciasis transmission simulated as the proportion (%) of 100 model runs for each baseline endemicity level and intervention scenario with 0% microfilarial prevalence 50 years after stopping ivermectin MDA.

BMP, baseline microfilarial prevalence; EOT, elimination of transmission; MDA, mass drug administration with ivermectin; SIZ, special intervention zone; VC, vector control by aerial larviciding of breeding sites.

**Table S10. Probability of elimination of onchocerciasis transmission (EOT) when simulating that ivermectin mass drug administration (MDA) stops in 2024, 2027 or 2030 per modelled (minimal, reference and enhanced) intervention scenario in Plateaux**

| Region and SIZ status<br><br>• Interventions                                                 | Modelled baseline endemicity | Probability of elimination of transmission (EOT, %) <sup>a</sup><br>(Number of villages following the scenario, with (BMP) or without (No BMP) recorded baseline microfilarial prevalence) |                                |                                   |                                 |                                |                                   |                                 |                                 |                                  |
|----------------------------------------------------------------------------------------------|------------------------------|--------------------------------------------------------------------------------------------------------------------------------------------------------------------------------------------|--------------------------------|-----------------------------------|---------------------------------|--------------------------------|-----------------------------------|---------------------------------|---------------------------------|----------------------------------|
|                                                                                              |                              | 2024                                                                                                                                                                                       |                                |                                   | 2027                            |                                |                                   | 2030                            |                                 |                                  |
|                                                                                              |                              | Minimal                                                                                                                                                                                    | Reference                      | Enhanced                          | Minimal                         | Reference                      | Enhanced                          | Minimal                         | Reference                       | Enhanced                         |
| Plateaux non-SIZ<br><br>• VC 1989-2002<br>• Annual MDA from 1991                             | Hypoendemic                  | ≥90<br>(12 BMP; 14 No BMP)                                                                                                                                                                 |                                |                                   |                                 |                                |                                   |                                 |                                 |                                  |
|                                                                                              | Mesoendemic                  | 60 – 89<br>(3 BMP;<br>2 No BMP)                                                                                                                                                            | ≥90<br>(12 BMP; 1 No BMP)      |                                   | 60 – 89<br>(3 BMP;<br>2 No BMP) | ≥90<br>(12 BMP; 1 No BMP)      |                                   | 60 – 89<br>(3 BMP;<br>2 No BMP) | ≥90<br>(12 BMP; 1 No BMP)       |                                  |
|                                                                                              | Hyperendemic                 | <5<br>(0)                                                                                                                                                                                  | <5<br>(3 No BMP)               | 60 – 89<br>(12 BMP;<br>6 No BMP)  | <5<br>(0)                       | <5<br>(3 No BMP)               | 60 – 89<br>(12 BMP;<br>6 No BMP)  | <5<br>(0)                       | <5<br>(3 No BMP)                | 60 – 89<br>(12 BMP;<br>6 No BMP) |
| Plateaux non-SIZ<br><br>• VC 1989-2002<br>• Annual MDA 1991-2013<br>• Biannual MDA from 2014 | Hypoendemic                  | ≥90<br>(16 BMP; 25 No BMP)                                                                                                                                                                 |                                |                                   |                                 |                                |                                   |                                 |                                 |                                  |
|                                                                                              | Mesoendemic                  |                                                                                                                                                                                            |                                |                                   |                                 |                                |                                   |                                 |                                 |                                  |
|                                                                                              | Hyperendemic                 | <5<br>(3 No BMP)                                                                                                                                                                           | 5 – 19<br>(2 BMP;<br>2 No BMP) | 60 – 89<br>(11 BMP;<br>12 No BMP) | <5<br>(3 No BMP)                | 5 – 19<br>(2 BMP;<br>2 No BMP) | 60 – 89<br>(11 BMP;<br>12 No BMP) | <5<br>(3 No BMP)                | 20 – 59<br>(2 BMP;<br>2 No BMP) | ≥90<br>(11 BMP;<br>12 No BMP)    |

<sup>a</sup>Probability of elimination of onchocerciasis transmission simulated as the proportion (%) of 100 model runs for each baseline endemicity level and intervention scenario with 0% microfilarial prevalence 50 years after stopping ivermectin MDA.

BMP, baseline microfilarial prevalence; EOT, elimination of transmission; MDA, mass drug administration with ivermectin; SIZ, special intervention zone; VC, vector control by aerial larviciding of breeding sites.



**Table S11. Probability of elimination of onchocerciasis transmission (EOT) when simulating that ivermectin mass drug administration (MDA) stops in 2014 or 2020 per modelled (minimal, reference and enhanced) intervention scenario in Maritime**

| Region and SIZ status<br><br>Interventions                       | Modelled<br>baseline<br>endemicity | Probability of elimination of transmission (EOT, %) <sup>a</sup><br>(Number of villages following the scenario, with (BMP) or without (No BMP)<br>recorded baseline microfilarial prevalence) |            |                |                       |            |                       |
|------------------------------------------------------------------|------------------------------------|-----------------------------------------------------------------------------------------------------------------------------------------------------------------------------------------------|------------|----------------|-----------------------|------------|-----------------------|
|                                                                  |                                    | 2014                                                                                                                                                                                          |            |                | 2020                  |            |                       |
|                                                                  |                                    | Minimal                                                                                                                                                                                       | Reference  | Enhanced       | Minimal               | Reference  | Enhanced              |
| Maritime non-SIZ<br><br>• VC 1989-2002<br>• Annual MDA from 1991 | Hypoendemic                        | ≥90<br>(6 BMP; 23 No BMP)                                                                                                                                                                     |            |                |                       |            |                       |
|                                                                  | Mesoendemic                        | 20 – 59<br>(0)                                                                                                                                                                                | ≥90<br>(0) |                | 60 – 89<br>(3 No BMP) | ≥90<br>(0) |                       |
|                                                                  | Hyperendemic                       | <5<br>(0)                                                                                                                                                                                     |            | 20 – 59<br>(0) | <5<br>(0)             |            | 20 – 59<br>(6 No BMP) |

<sup>a</sup>Probability of elimination of onchocerciasis transmission simulated as the proportion (%) of 100 model runs for each baseline endemicity level and intervention scenario with 0% microfilarial prevalence 50 years after stopping ivermectin MDA.

BMP, baseline microfilarial prevalence; EOT, elimination of transmission; MDA, mass drug administration with ivermectin; SIZ, special intervention zone; VC, vector control by aerial larviciding of breeding sites.

**Table S12. Probability of elimination of onchocerciasis transmission (EOT) when simulating that ivermectin mass drug administration (MDA) stops in 2024, 2027 or 2030 per modelled (minimal, reference and enhanced) intervention scenario in Maritime**

| Region and SIZ status<br><br>Interventions                       | Modelled<br>baseline<br>endemicity | Probability of elimination of transmission (EOT, %) <sup>a</sup><br>(Number of villages following the scenario, with (BMP) or without (No BMP) recorded baseline microfilarial prevalence) |           |                                 |                |           |                                 |            |           |                                 |
|------------------------------------------------------------------|------------------------------------|--------------------------------------------------------------------------------------------------------------------------------------------------------------------------------------------|-----------|---------------------------------|----------------|-----------|---------------------------------|------------|-----------|---------------------------------|
|                                                                  |                                    | 2024                                                                                                                                                                                       |           |                                 | 2027           |           |                                 | 2030       |           |                                 |
|                                                                  |                                    | Minimal                                                                                                                                                                                    | Reference | Enhanced                        | Minimal        | Reference | Enhanced                        | Minimal    | Reference | Enhanced                        |
| Maritime non-SIZ<br><br>• VC 1989-2002<br>• Annual MDA from 1991 | Hypoendemic                        | ≥90<br>(0)                                                                                                                                                                                 |           |                                 |                |           |                                 |            |           |                                 |
|                                                                  | Mesoendemic                        | 60 – 89<br>(0)                                                                                                                                                                             |           | ≥90<br>(0)                      | 60 – 89<br>(0) |           | ≥90<br>(0)                      | ≥90<br>(0) |           |                                 |
|                                                                  | Hyperendemic                       | <5<br>(0)                                                                                                                                                                                  |           | 60 – 89<br>(1 BMP;<br>2 No BMP) | <5<br>(0)      |           | 60 – 89<br>(1 BMP;<br>2 No BMP) | <5<br>(0)  |           | 60 – 89<br>(1 BMP;<br>2 No BMP) |

<sup>a</sup>Probability of elimination of onchocerciasis transmission simulated as the proportion (%) of 100 model runs for each baseline endemicity level and intervention scenario with 0% microfilarial prevalence 50 years after stopping ivermectin MDA.

BMP, baseline microfilarial prevalence; EOT, elimination of transmission; MDA, mass drug administration with ivermectin; SIZ, special intervention zone; VC, vector control by aerial larviciding of breeding sites.

## Text S8. Villages projected not to reach elimination of onchocerciasis transmission (EOT) if ivermectin MDA stops in 2027, per region and special intervention zone (SIZ) status

Tables S13-S18 (villages with recorded BMP estimates) and Tables S19-S24 (villages without recorded BMP estimates) provide details, by region, prefecture and river basin, of villages for which EPIONCHO-IBM projects that elimination of onchocerciasis transmission (EOT) may not be achieved if ivermectin MDA stops in 2027 (i.e., with predicted EOT probability <90%). (For calculation of EOT probabilities see Main Text and Tables S7-S12.) These villages could be prioritised for focused pre-stop or stop-MDA surveys to evaluate their progress and obtain a more complete assessment of the epidemiological situation in the region towards the 2030 elimination goals. For example, in Plateaux non-SIZ, the formerly hyperendemic village of Kokote (Mono River Basin) had a sharp prevalence decline from 76% in 1977 to 56% in 1990 and to 2% in 2000. A survey in 2007, and a small survey (51 individuals) in 2014, detected no positive cases. However, a larger survey (253 individuals), also in 2014, identified one positive case, suggesting residual transmission. This finding is consistent with model outputs (Figure 5E of the Main Text), with an EOT probability of 60–89% (Table S17).

### S8.1. Villages with recorded baseline microfilarial prevalence estimates (with BMP)

**Table S13. Villages in Savanes not included in the special intervention zone (non-SIZ)**

| Village                     | Prefecture | Modelled prevalence trends followed by villages (intervention scenario) | Latest parasitological survey |                                       | EOT probability (%) if MDA stops in 2027 |
|-----------------------------|------------|-------------------------------------------------------------------------|-------------------------------|---------------------------------------|------------------------------------------|
|                             |            |                                                                         | Year                          | Microfilarial prevalence (%) (95% CI) |                                          |
| White Volta/Oti River Basin |            |                                                                         |                               |                                       |                                          |
| Samomoni <sup>a,b</sup>     | Tône       | Hyperendemic with 100% vector control (minimal)                         | 2015                          | 0.8 (0.1–5.2)                         | 20–59                                    |
| Koundjouaré <sup>b</sup>    | Kpendjal   | Hyperendemic with 100% vector control (minimal)                         | 2001                          | 0.1 (0.0–0.3)                         | 20–59                                    |

<sup>a</sup>Recorded in a baseline survey prior to the start of the Onchocerciasis Control Programme in West Africa [1,2].

<sup>b</sup>For these two villages the model indicates an EOT probability of 20–59%; surveys conducted in the 2000s showed residual prevalence, which along with model simulations, suggest that prevalence may have been sustained over time if EOT was not achieved by the mid-1990s, when VC stopped.

**Table S14. Villages in Kara included in the special intervention zone (SIZ)**

| Village                  | Prefecture     | Modelled prevalence trends followed by villages (intervention scenario) | Latest parasitological survey |                                       | EOT probability (%) if MDA stops in 2027 |
|--------------------------|----------------|-------------------------------------------------------------------------|-------------------------------|---------------------------------------|------------------------------------------|
|                          |                |                                                                         | Year                          | Microfilarial prevalence (%) (95% CI) |                                          |
| Kara River Basin         |                |                                                                         |                               |                                       |                                          |
| Kpesside                 | Kozah          | Hyperendemic (minimal)                                                  | 2014                          | 1.4 (0.5–3.9)                         | 5–19                                     |
| Leon                     | Doufelgou      | Hyperendemic (reference)                                                | 2011                          | 0.0 (0.0–1.4)                         | 60–89                                    |
| Kéran River Basin        |                |                                                                         |                               |                                       |                                          |
| Unknown <sup>a</sup>     | Binah or Bimah | Hyperendemic (reference)                                                | 1970                          | >70%                                  | 60–89                                    |
| Tchitchira <sup>b</sup>  | Kéran          | Holoendemic (enhanced)                                                  | 2015                          | 8.2 (5.1–12.9)                        | <5                                       |
| Titira <sup>c</sup>      | Kéran          | Holoendemic (enhanced)                                                  | 2006                          | 1.6 (0.5–4.6)                         | <5                                       |
| Mô River Basin           |                |                                                                         |                               |                                       |                                          |
| Bangan <sup>b</sup>      | Bassar         | Hyperendemic (reference)                                                | 2011                          | 2.5 (1.2–5.4)                         | 60–89                                    |
| Mô-village or Mo-village | Bassar         | Hyperendemic (minimal)                                                  | 2015                          | 7.0 (4.2–11.7)                        | 5–19                                     |

<sup>a</sup>Recorded in a baseline survey prior to the start of the Onchocerciasis Control Programme in West Africa [1,2].

<sup>b</sup>In 2015, prevalence of *O. volvulus* infection in *Simulium damnosum* sensu lato was 0.1% (95% CI: 0.03–0.5%) in Bangan and 1.0% (95% CI: 0.9–2.1%) in Tchitchira [4].

<sup>c</sup>In Titira, annual biting rates decreased from 25,000 bites/person/year before control to 10,000–15,000 [5].

**Table S15. Villages in Centrale included in the special intervention zone (SIZ)**

| Village                | Prefecture | Modelled prevalence trends followed by villages (intervention scenario) | Latest parasitological survey |                                       | EOT probability (%) if MDA stops in 2027 |
|------------------------|------------|-------------------------------------------------------------------------|-------------------------------|---------------------------------------|------------------------------------------|
|                        |            |                                                                         | Year                          | Microfilarial prevalence (%) (95% CI) |                                          |
| Mô River Basin         |            |                                                                         |                               |                                       |                                          |
| Bouzalo <sup>a,b</sup> | Tchaoudjo  | Hyperendemic (reference)                                                | 1993                          | 7.5 (5.3–10.5)                        | 60–89                                    |
| Sagbadai               | Tchaoudjo  | Hyperendemic (minimal)                                                  | 2007                          | 1.8 (0.3–9.5)                         | 5–19                                     |

<sup>a</sup>In 2015, the prevalence of *O. volvulus* infection in *Simulium damnosum* sensu lato was 0.5% (95% CI: 0.2–1.3%) in Bouzalo [4]. In 2018–2019, the prevalence was 0.6% [6] (calculated with the methodology presented in Katholi et al. [7]). <sup>b</sup>In Bouzalo, annual biting rates decreased from over 40,000 bites/person/year before vector control to 30,000. The vector control extension during the Southern Extension of the OCP further decreased this to 10,000–15,000. In Titira, annual biting rates decreased from 25,000 bites/person/year before vector control to 10,000–15,000 [5].

**Table S16. Villages in Centrale not included in the special intervention zone (non-SIZ)**

| Village                                    | Prefecture | Modelled prevalence trends followed by villages (intervention scenario) | Latest parasitological survey |                                       | EOT probability (%) if MDA stops in 2027 |
|--------------------------------------------|------------|-------------------------------------------------------------------------|-------------------------------|---------------------------------------|------------------------------------------|
|                                            |            |                                                                         | Year                          | Microfilarial prevalence (%) (95% CI) |                                          |
| Anié River Basin (Mono)                    |            |                                                                         |                               |                                       |                                          |
| Agodeka <sup>a</sup>                       | Blitta     | Hyperendemic (enhanced)                                                 | 2012                          | 0.0 (0.0–2.2)                         | 60–89                                    |
| Didjaré-Edjaré Kopé/Katakpui Kopé (Pagala) | Blitta     | Mesoendemic (minimal)                                                   | 2014                          | 0.3 (0.1–1.9)                         | 60–89                                    |
| Gnama-Gnama                                | Blitta     | Hyperendemic (enhanced)                                                 | 2012                          | 0.0 (0.0–5.4)                         | 60–89                                    |
| Kpawa (Pagala)                             | Blitta     | Hyperendemic (enhanced)                                                 | 2013                          | 0.0 (0.0–1.3)                         | 60–89                                    |
| Niama-Niama (Pagala)                       | Blitta     | Hyperendemic (enhanced)                                                 | 2006                          | 2.6 (0.9–7.5)                         | 60–89                                    |
| N'Djavezi/Fazao                            | Sotouboua  | Mesoendemic (minimal)                                                   | 2014                          | 0.0 (0.0–3.8)                         | 60–89                                    |
| Tigbada                                    | Sotouboua  | Mesoendemic (minimal)                                                   | 2013                          | 1.0 (0.3–3.5)                         | 60–89                                    |
| Asukawkaw River Basin                      |            |                                                                         |                               |                                       |                                          |
| Abossoumkopé <sup>a</sup>                  | Blitta     | Hyperendemic (enhanced)                                                 | 2013                          | 0.0 (0.0–6.1)                         | 60–89                                    |
| Landa-Mono River Basin (Mono)              |            |                                                                         |                               |                                       |                                          |
| Bodowda                                    | Sotouboua  | Mesoendemic (minimal)                                                   | 2013                          | 0.0 (0.0–4.5)                         | 60–89                                    |
| Laoude/Somieda-Laoude                      | Sotouboua  | Mesoendemic (minimal)                                                   | 2013                          | 0.6 (0.1–3.3)                         | 60–89                                    |
| Sessaro                                    | Sotouboua  | Mesoendemic (minimal)                                                   | 2014                          | 0.3 (0.1–1.9)                         | 60–89                                    |
| Souroutawi                                 | Tchamba    | Mesoendemic (minimal)                                                   | 2013                          | 0.3 (0.1–1.7)                         | 60–89                                    |
| Mono River Basin (Aou)                     |            |                                                                         |                               |                                       |                                          |
| Aou-Losso                                  | Tchaoudjo  | Mesoendemic (minimal)                                                   | 2013                          | 0.6 (0.1–3.1)                         | 60–89                                    |

<sup>a</sup>Villages with the latest two (Agodeka) or three (Abossoumkopé) surveys with 0% prevalence [8].

**Table S17. Villages in Plateaux not included in the special intervention zone (non-SIZ)**

| Village                    | Prefecture | Modelled prevalence trends followed by villages<br>(intervention scenario) | Latest parasitological survey |                                          | EOT probability (%) if MDA stops in 2027 |
|----------------------------|------------|----------------------------------------------------------------------------|-------------------------------|------------------------------------------|------------------------------------------|
|                            |            |                                                                            | Year                          | Microfilarial prevalence (%)<br>(95% CI) |                                          |
| Amou River Basin (Mono)    |            |                                                                            |                               |                                          |                                          |
| Otsanani-Adedakope         | Ogou       | Hyperendemic (enhanced) under biannual CDTI since 2014                     | 2012                          | 1.2<br>(0.3–3.5)                         | 60–89                                    |
| Anié River Basin (Mono)    |            |                                                                            |                               |                                          |                                          |
| Alamassou                  | Ogou       | Hyperendemic (enhanced) under biannual CDTI since 2014                     | 2012                          | 0.0<br>(0.0–1.5)                         | 60–89                                    |
| Anani/Dogo Kopé            | Akébou     | Hyperendemic (enhanced) under annual CDTI                                  | 2012                          | 1.0<br>(0.4–3.0)                         | 60–89                                    |
| Gnamassilé                 | Amou       | Hyperendemic (enhanced) under biannual CDTI since 2014                     | 2014                          | 0.0<br>(0.0–2.7)                         | 60–89                                    |
| Illougba                   | Ogou       | Hyperendemic (enhanced) under biannual CDTI since 2014                     | 2007                          | 0.0<br>(0.0–1.9)                         | 60–89                                    |
| Kamalo-Kopé <sup>a</sup>   | Anié       | Hyperendemic (enhanced) under annual CDTI                                  | 2007                          | 0.0<br>(0.0–2.9)                         | 60–89                                    |
| Konigbo                    | Anié       | Hyperendemic (enhanced) under annual CDTI                                  | 2012                          | 0.0<br>(0.0–1.1)                         | 60–89                                    |
| Wawa/Asukawkaw River Basin |            |                                                                            |                               |                                          |                                          |
| Kemedisso                  | Wawa       | Mesoendemic (minimal) under annual CDTI                                    | 2007                          | 0.0<br>(0.0–4.5)                         | 60–89                                    |
| Kra River Basin (Mono)     |            |                                                                            |                               |                                          |                                          |
| Kokpli                     | Haho       | Hyperendemic (enhanced) under biannual CDTI since 2014                     | 2006                          | 1.0<br>(0.3–3.4)                         | 60–89                                    |
| Mono River Basin           |            |                                                                            |                               |                                          |                                          |
| Aglamassoe/Tététou         | Moyen-Mono | Mesoendemic (minimal) under annual CDTI                                    | 2014                          | 0.0<br>(0.0–10.7)                        | 60–89                                    |
| Alabade Atsoude            | Est-Mono   | Hyperendemic (enhanced) under annual CDTI                                  | 2013                          | 0.0<br>(0.0–1.9)                         | 60–89                                    |

Table S17. Continued

| Village                      | Prefecture | Modelled prevalence trends followed by villages<br>(intervention scenario) | Latest parasitological survey |                                          | EOT probability (%) if MDA stops in 2027 |
|------------------------------|------------|----------------------------------------------------------------------------|-------------------------------|------------------------------------------|------------------------------------------|
|                              |            |                                                                            | Year                          | Microfilarial prevalence (%)<br>(95% CI) |                                          |
| Mono River Basin (continued) |            |                                                                            |                               |                                          |                                          |
| Atome                        | Ogou       | Hyperendemic (enhanced) under biannual CDTI since 2014                     | 2015                          | 0.4<br>(0.1–2.3)                         | 60–89                                    |
| Aroukakopé (Amou-Oblo)       | Est-Mono   | Hyperendemic (enhanced) under annual CDTI                                  | 2011                          | 0.0<br>(0.0–2.5)                         | 60–89                                    |
| Diome (Tététou)              | Moyen-Mono | Hyperendemic (enhanced) under annual CDTI                                  | 1977                          | 77.0<br>(71.8–81.4)                      | 60–89                                    |
| Fedigbe or Fétigbé           | Ogou       | Hyperendemic (enhanced) under biannual CDTI since 2014                     | 2007                          | 0.0<br>(0.0–1.8)                         | 60–89                                    |
| Game-Ekeme                   | Moyen-Mono | Hyperendemic (enhanced) under annual CDTI                                  | 2011                          | 0.0<br>(0.0–5.8)                         | 60–89                                    |
| Game-Togbuihoe               | Moyen-Mono | Hyperendemic (enhanced) under annual CDTI                                  | 2011                          | 0.0<br>(0.0–4.8)                         | 60–89                                    |
| Kokote <sup>b</sup>          | Est-Mono   | Hyperendemic (enhanced) under annual CDTI                                  | 2014                          | 0.4<br>(0.1–2.2)                         | 60–89                                    |
| Kpodji (Tététou)             | Haho       | Hyperendemic (reference) under biannual CDTI since 2014                    | 2014                          | 17.5<br>(9.8–29.4)                       | 5–19                                     |
| Kpogandi <sup>a</sup>        | Ogou       | Hyperendemic (enhanced) under biannual CDTI since 2014                     | 2013                          | 0.0<br>(0.0–2.9)                         | 60–89                                    |
| Onia-Kopé                    | Est-Mono   | Hyperendemic (enhanced) under annual CDTI                                  | 1977                          | 75.2<br>(67.5–81.6)                      | 60–89                                    |
| Safou-Kopé Atiba (Amou-Oblo) | Ogou       | Hyperendemic (reference) under biannual CDTI since 2014                    | 2014                          | 4.1<br>(1.4–11.4)                        | 5–19                                     |
| Siyime (Tététou)             | Haho       | Mesoendemic/Hyperendemic (reference) under biannual CDTI since 2014        | 2015                          | 2.9<br>(1.2–6.6)                         | 5–19                                     |

Table S17. Continued

| Village                                           | Prefecture | Modelled prevalence trends followed by villages<br>(intervention scenario) | Latest parasitological survey |                                          | EOT probability (%) if MDA stops in 2027 |
|---------------------------------------------------|------------|----------------------------------------------------------------------------|-------------------------------|------------------------------------------|------------------------------------------|
|                                                   |            |                                                                            | Year                          | Microfilarial prevalence (%)<br>(95% CI) |                                          |
| Mono River Basin (continued)                      |            |                                                                            |                               |                                          |                                          |
| Tchagri                                           | Ogou       | Hyperendemic (enhanced) under biannual CDTI since 2014                     | 2012                          | 0.0<br>(0.0–1.0)                         | 60–89                                    |
| Tététou or Tetetou                                | Haho       | Hyperendemic (enhanced) under biannual CDTI since 2014                     | 2002                          | 0.0<br>(0.0–1.6)                         | 60–89                                    |
| Ogou River Basin (Mono)                           |            |                                                                            |                               |                                          |                                          |
| Ateoue                                            | Ogou       | Hyperendemic (enhanced) under biannual CDTI since 2014                     | 2000                          | 4.1<br>(2.3–7.2)                         | 60–89                                    |
| Wawa River Basin (Gban-Houa) <sup>c</sup>         |            |                                                                            |                               |                                          |                                          |
| Dayes-Dodzi (Djodji)/ Kessibo-Dzodzi <sup>d</sup> | Wawa       | Hyperendemic (enhanced) under annual CDTI                                  | 2000                          | 2.2<br>(0.7–5.8)                         | 60–89                                    |
| Zio River Basin (Volta Lac-East)                  |            |                                                                            |                               |                                          |                                          |
| Tokpo                                             | Agou       | Hyperendemic (enhanced) under annual CDTI                                  | 2014                          | 0.0<br>(0.0–2.4)                         | 60–89                                    |

CDTI: Community-directed treatment with ivermectin

<sup>a</sup>Villages with the latest two (Kpogandji) or four (Kamalo-Kopé) surveys with 0% prevalence [8].

<sup>b</sup>Kokote is located around the Kpessi vector capture point of the Mono River Basin (Supplementary Material 1, Table S4). In contrast to the modelled projections followed by most hypoendemic villages in Plateaux, the village of Babame, also in Kpessi, had a microfilarial prevalence of 0.6% (95%CI: 0.1–3.4%) in 2014 [8].

<sup>c</sup>In locations where the Djodji form of *Simulium sanctipauli* was present, recent data indicate still high biting rates following its elimination, by other species in the *damnosum* complex [9,10].

<sup>d</sup>Vector control started earlier, in 1981, in this village's river basin to eliminate the Djodji form of *Simulium sanctipauli* [11], preceding its first survey, in which hyperendemicity was determined.



**Table S18. Villages in Maritime not included in the special intervention zone (non-SIZ)**

| Village               | Prefecture | Modelled prevalence trends followed by villages<br>(intervention scenario) | Latest parasitological survey |                                          | EOT probability (%) if MDA stops in 2027 |
|-----------------------|------------|----------------------------------------------------------------------------|-------------------------------|------------------------------------------|------------------------------------------|
|                       |            |                                                                            | Year                          | Microfilarial prevalence (%)<br>(95% CI) |                                          |
| Yoto/Haho River Basin |            |                                                                            |                               |                                          |                                          |
| Yoto-Kopé             | Yoto       | Hyperendemic (enhanced)                                                    | 2005                          | 0.0<br>(0.0–2.5)                         | 60–89                                    |

## S8.2. Villages without recorded baseline microfilarial prevalence (without BMP)

Table S19. Villages in Savanes included in the special intervention zone (SIZ)

| Village               | Prefecture | Modelled prevalence trends followed by villages<br>(intervention scenario) | Latest parasitological survey |                                          | EOT probability (%) if MDA stops in 2027 |
|-----------------------|------------|----------------------------------------------------------------------------|-------------------------------|------------------------------------------|------------------------------------------|
|                       |            |                                                                            | Year                          | Microfilarial prevalence (%)<br>(95% CI) |                                          |
| Oti River Basin       |            |                                                                            |                               |                                          |                                          |
| Bonsougou             | Oti        | Hyperendemic (enhanced)                                                    | 2007                          | 0.0<br>(0.0–3.8)                         | 60–89                                    |
| Boutchakou            | Oti        | Hyperendemic (enhanced)                                                    | 2015                          | 0.8<br>(0.1–4.3)                         | 60–89                                    |
| Djandjatie            | Oti        | Hyperendemic (enhanced)                                                    | 2011                          | 0.6<br>(0.1–3.5)                         | 60–89                                    |
| Koukoubou             | Oti        | Hyperendemic (minimal)                                                     | 2015                          | 3.7<br>(1.3–10.2)                        | <5                                       |
| Kpatibori             | Oti        | Hyperendemic (minimal)                                                     | 2014                          | 9.1<br>(2.6–27.8)                        | <5                                       |
| Kpintidjouaga         | Kpendjal   | Hyperendemic (enhanced)                                                    | 2011                          | 0.4<br>(0.1–2.1)                         | 60–89                                    |
| Moukaga               | Kpendjal   | Hyperendemic (enhanced)                                                    | 2006                          | 0.0<br>(0.0–4.4)                         | 60–89                                    |
| Naboli                | Oti        | Hyperendemic (enhanced)                                                    | 2015                          | 0.0<br>(0.0–2.6)                         | 60–89                                    |
| Nambossi              | Oti        | Hyperendemic (enhanced)                                                    | 2011                          | 0.4<br>(0.1–2.0)                         | 60–89                                    |
| Nassiele              | Kpendjal   | Hyperendemic (enhanced)                                                    | 2006                          | 1.3<br>(0.2–7.0)                         | 60–89                                    |
| Natoundjenga          | Kpendjal   | Hyperendemic (enhanced)                                                    | 2011                          | 0.0<br>(0.0–2.9)                         | 60–89                                    |
| Natounkpargou         | Kpendjal   | Hyperendemic with 100% vector control (enhanced)                           | 2011                          | 0.0<br>(0.0–1.6)                         | 60–89                                    |
| Pancerys <sup>a</sup> | Kpendjal   | Hyperendemic (reference)                                                   | 2015                          | 1.5<br>(0.6–3.9)                         | 20–59                                    |
| Poporkou              | Oti        | Hyperendemic with 100% vector control (enhanced)                           | 2015                          | 0.0<br>(0.0–2.3)                         | 60–89                                    |

<sup>a</sup>In 2015, the prevalence of *O. volvulus* infection in *Simulium damnosum* sensu lato was 0.2% (95% CI: 0.03–1.3%) in Pancerys [4].

Table S19. Continued

| Village                                                | Prefecture | Modelled prevalence trends followed by villages<br>(intervention scenario) | Latest parasitological survey |                                          | EOT probability (%) if MDA stops in 2027 |
|--------------------------------------------------------|------------|----------------------------------------------------------------------------|-------------------------------|------------------------------------------|------------------------------------------|
|                                                        |            |                                                                            | Year                          | Microfilarial prevalence (%)<br>(95% CI) |                                          |
| Oti River Basin                                        |            |                                                                            |                               |                                          |                                          |
| Simbo <sup>a</sup>                                     | Oti        | Hyperendemic (reference)                                                   | 2011                          | 2.0<br>(0.7–5.7)                         | 20–59                                    |
| Sougtangou                                             | Kpendjal   | Hyperendemic (reference)                                                   | 2011                          | 1.3<br>(0.4–4.5)                         | 20–59                                    |
| Tchountchonga <sup>a</sup>                             | Oti        | Hyperendemic (reference)                                                   | 2011                          | 0.5<br>(0.1–3.0)                         | 20–59                                    |
| Tchri <sup>a</sup>                                     | Oti        | Hyperendemic (minimal)                                                     | 2015                          | 1.0<br>(0.2–5.7)                         | <5                                       |
| Yiyingou                                               | Oti        | Hyperendemic (enhanced)                                                    | 2011                          | 1.1<br>(0.4–3.1)                         | 60–89                                    |
| Oti-Pendjari River Basin / Volta Blanche (White Volta) |            |                                                                            |                               |                                          |                                          |
| Lokpano                                                | Tandjouaré | Hyperendemic with 100% vector control (enhanced)                           | 2014                          | 0.5<br>(0.1–2.7)                         | 60–89                                    |

<sup>a</sup>Villages for which it has been reported that the epidemiological situation was unsatisfactory, and may have received biannual CDTI in the late 1990's for approximately 2 years [12].

**Table S20. Villages in Kara included in the special intervention zone (SIZ)**

| Village                               | Prefecture | Modelled prevalence trends followed by villages<br>(intervention scenario) | Latest parasitological survey |                                          | EOT probability (%) if MDA stops in 2027 |
|---------------------------------------|------------|----------------------------------------------------------------------------|-------------------------------|------------------------------------------|------------------------------------------|
|                                       |            |                                                                            | Year                          | Microfilarial prevalence (%)<br>(95% CI) |                                          |
| Oti River Basin                       |            |                                                                            |                               |                                          |                                          |
| Kpabte                                | Doufelgou  | Hyperendemic (reference)                                                   | 2006                          | 4.9<br>(2.8–8.5)                         | 60–89                                    |
| Possao                                | Dankpen    | Hyperendemic (minimal)                                                     | 2014                          | 1.1<br>(0.4–3.2)                         | 5–19                                     |
| Kara River Basin                      |            |                                                                            |                               |                                          |                                          |
| Aho-Lao                               | Kozah      | Holoendemic (enhanced)                                                     | 2000                          | 22.8<br>(18.8–27.4)                      | <5                                       |
| Djamde Kawa                           | Kozah      | Hyperendemic (minimal)                                                     | 2011                          | 0.6<br>(0.1–3.1)                         | 5–19                                     |
| Kadjol II                             | Dankpen    | Hyperendemic (minimal)                                                     | 2014                          | 0.5<br>(0.1–2.6)                         | 5–19                                     |
| Kawa-Bassar                           | Bassar     | Hyperendemic (reference)                                                   | 2015                          | 0.0<br>(0.0–2.7)                         | 60–89                                    |
| Koulwere                              | Doufelgou  | Hyperendemic (minimal)                                                     | 2015                          | 1.7<br>(0.6–4.9)                         | 5–19                                     |
| Sakponé                               | Dankpen    | Hyperendemic (minimal)                                                     | 2014                          | 0.7<br>(0.2–2.3)                         | 5–19                                     |
| Sekou-Bas                             | Dankpen    | Hyperendemic (reference)                                                   | 2014                          | 0.4<br>(0.1–2.2)                         | 60–89                                    |
| Sikan <sup>a</sup>                    | Dankpen    | Holoendemic (enhanced)                                                     | 2014                          | 1.2<br>(0.5–3.0)                         | <5                                       |
| Tchakassou                            | Bassar     | Holoendemic (enhanced)                                                     | 2015                          | 4.2<br>(2.4–7.2)                         | <5                                       |
| Touguel                               | Dankpen    | Holoendemic (enhanced)                                                     | 2014                          | 1.0<br>(0.3–2.8)                         | <5                                       |
| Wassi                                 | Bassar     | Holoendemic (reference)                                                    | 2014                          | 27.0<br>(18.2–38.1)                      | <5                                       |
| Kerán River Basin                     |            |                                                                            |                               |                                          |                                          |
| Goulbi                                | Kéran      | Holoendemic (enhanced)                                                     | 2015                          | 9.9<br>(5.9–16.1)                        | <5                                       |
| Hourta                                | Kéran      | Hyperendemic (minimal)                                                     | 2015                          | 2.3<br>(0.6–7.8)                         | 5–19                                     |
| Koffi-Ferme                           | Kéran      | Holoendemic (enhanced)                                                     | 2014                          | 5.4<br>(1.8–14.6)                        | <5                                       |
| Koutantagou/<br>Koutantagou & Tapount | Kéran      | Hyperendemic (minimal)                                                     | 2015                          | 1.9<br>(0.3–9.8)                         | 5–19                                     |

Table S20. Continued

| Village                        | Prefecture | Modelled prevalence trends followed by villages<br>(intervention scenario) | Latest parasitological survey |                                          | EOT probability (%) if MDA stops in 2027 |
|--------------------------------|------------|----------------------------------------------------------------------------|-------------------------------|------------------------------------------|------------------------------------------|
|                                |            |                                                                            | Year                          | Microfilarial prevalence (%)<br>(95% CI) |                                          |
| Kerán River Basin (continued)  |            |                                                                            |                               |                                          |                                          |
| Koutougou Solla                | Kéran      | Holoendemic (enhanced)                                                     | 2015                          | 13.6<br>(7.8–22.7)                       | <5                                       |
| Kpantiyyagou                   | Kéran      | Holoendemic (enhanced)                                                     | 2015                          | 7.7<br>(4.5–12.9)                        | <5                                       |
| Narita / Pesside               | Kéran      | Holoendemic (enhanced)                                                     | 2014                          | 6.5<br>(3.3–12.3)                        | <5                                       |
| Sola                           | Kéran      | Holoendemic (enhanced)                                                     | 2000                          | 41.8<br>(32.2–52.0)                      | <5                                       |
| Tchitchira Ferme               | Kéran      | Holoendemic (reference)                                                    | 2002                          | 59.0<br>(42.3–74.5)                      | <5                                       |
| Wasite & Pesside Ferme/Wassite | Kéran      | Holoendemic (reference)                                                    | 2004                          | 16.3<br>(11.6–22.4)                      | <5                                       |
| Wartema                        | Kéran      | Hyperendemic (minimal)                                                     | 2002                          | 25.5<br>(17.8–35.2)                      | 5–19                                     |
| Mô River Basin                 |            |                                                                            |                               |                                          |                                          |
| Dandjessi                      | Bassar     | Hyperendemic (minimal)                                                     | 2012                          | 3.0<br>(1.5–6.1)                         | 5–19                                     |
| Katcha-Konkomba                | Bassar     | Hyperendemic (minimal)                                                     | 2015                          | 4.3<br>(2.3–7.7)                         | 5–19                                     |
| Kissafo                        | Bassar     | Hyperendemic (minimal)                                                     | 2012                          | 3.3%<br>1.9–5.8)                         | 5–19                                     |
| Madjatomb <sup>b</sup>         | Bassar     | Hyperendemic (minimal)                                                     | 2015                          | 0.7<br>(0.1–3.7)                         | 5–19                                     |
| Saboundi                       | Bassar     | Hyperendemic (minimal)                                                     | 2015                          | 1.5<br>(0.3–5.7)                         | 5–19                                     |

<sup>a</sup>Vector control was very effective in Sikan, bringing the annual transmission potential to 0 in 2006 [5].

Ivermectin treatment coverage was reported at 90% of total population in 2003 [13].

<sup>b</sup>Surveys with consistently low prevalence for 15 years [8].

**Table S21. Villages in Centrale included in the special intervention zone (SIZ)**

| Village         | Prefecture | Modelled prevalence trends followed by villages<br>(intervention scenario) | Latest parasitological survey |                                          | EOT probability (%) if MDA stops in 2027 |
|-----------------|------------|----------------------------------------------------------------------------|-------------------------------|------------------------------------------|------------------------------------------|
|                 |            |                                                                            | Year                          | Microfilarial prevalence (%)<br>(95% CI) |                                          |
| Mô River Basin  |            |                                                                            |                               |                                          |                                          |
| Agbamassoumou   | Sotouboua  | Hyperendemic (reference)                                                   | 2012                          | 0.0<br>(0.0–1.5)                         | 60–89                                    |
| Assawoh-Koura   | Sotouboua  | Holoendemic (enhanced)                                                     | 2015                          | 10.3<br>(5.7–18.0)                       | <5                                       |
| Banda           | Sotouboua  | Holoendemic (enhanced)                                                     | 2015                          | 4.4<br>(2.3–8.5)                         | <5                                       |
| Batto           | Sotouboua  | Holoendemic (minimal)                                                      | 2014                          | 32.7<br>(21.2–46.6)                      | <5                                       |
| Dantchessi      | Sotouboua  | Hyperendemic (minimal)                                                     | 2006                          | 8.5<br>(5.0–14.0)                        | 5–19                                     |
| Koida or Kouida | Sotouboua  | Holoendemic (enhanced)                                                     | 2015                          | 5.8<br>(3.5–9.6)                         | <5                                       |
| Moussoukoudjou  | Sotouboua  | Hyperendemic (reference)                                                   | 2006                          | 3.0<br>(1.0–8.5)                         | 60–89                                    |
| Naboun-Koura    | Sotouboua  | Hyperendemic (reference)                                                   | 2009                          | 0.6<br>(0.1–3.1)                         | 60–89                                    |
| Sakpagninga     | Sotouboua  | Holoendemic (enhanced)                                                     | 2003                          | 15.8<br>(9.4–25.0)                       | <5                                       |
| Tchakpissi      | Sotouboua  | Holoendemic (enhanced)                                                     | 2015                          | 10.5<br>(4.2–24.1)                       | <5                                       |
| Tchatou Koura   | Sotouboua  | Hyperendemic (minimal)                                                     | 2015                          | 3.3<br>(1.5–7.1)                         | 5–19                                     |
| Tchetchekou     | Sotouboua  | Hyperendemic (minimal)                                                     | 2015                          | 3.5<br>(1.6–7.4)                         | 5–19                                     |

**Table S22. Villages in Centrale not included in the special intervention zone (non-SIZ)**

| Village                             | Prefecture | Modelled prevalence trends followed by villages<br>(intervention scenario) | Latest parasitological survey |                                          | EOT probability (%) if MDA stops in 2027 |
|-------------------------------------|------------|----------------------------------------------------------------------------|-------------------------------|------------------------------------------|------------------------------------------|
|                                     |            |                                                                            | Year                          | Microfilarial prevalence (%)<br>(95% CI) |                                          |
| Anié River Basin (Mono) / Asukawkaw |            |                                                                            |                               |                                          |                                          |
| Agbandi-Mono                        | Blitta     | Hyperendemic (enhanced)                                                    | 2015                          | 0.3<br>(0.1–1.8)                         | 60–89                                    |
| Yeloum Bagnan                       | Blitta     | Hyperendemic (enhanced)                                                    | 2012                          | 1.3<br>(0.5–3.9)                         | 60–89                                    |
| Katchalikadi                        | Sotouboua  | Hyperendemic (enhanced)                                                    | 2012                          | 1.6<br>(0.5–5.7)                         | 60–89                                    |
| Kpeida                              | Sotouboua  | Mesoendemic (minimal)                                                      | 2013                          | 0.0<br>(0.0–2.0)                         | 60–89                                    |
| Okou-Kopé                           | Blitta     | Mesoendemic (minimal)                                                      | 2012                          | 0.0<br>(0.0–3.0)                         | 60–89                                    |
| Panlao                              | Sotouboua  | Mesoendemic (minimal)                                                      | 2013                          | 0.0<br>(0.0–1.9)                         | 60–89                                    |
| Yovo-Kopé                           | Blitta     | Mesoendemic (minimal)                                                      | 2012                          | 0.0<br>(0.0–2.5)                         | 60–89                                    |
| Mono River Basin                    |            |                                                                            |                               |                                          |                                          |
| Akawolo                             | Tchamba    | Mesoendemic (minimal)                                                      | 2011                          | 0.0<br>(0.0–1.6)                         | 60–89                                    |
| Kpambouré (Aou)                     | Sotouboua  | Mesoendemic (minimal)                                                      | 2002                          | 3.3<br>(1.8–5.9)                         | 60–89                                    |
| Oudjomboi                           | Tchamba    | Mesoendemic (minimal)                                                      | 2011                          | 0.5<br>(0.1–2.5)                         | 60–89                                    |
| Sada-Mono                           | Sotouboua  | Mesoendemic (minimal)                                                      | 2002                          | 4.5<br>(2.7–7.2)                         | 60–89                                    |
| Ogou River Basin (Mono)             |            |                                                                            |                               |                                          |                                          |
| Blou-Elavagnon                      | Tchamba    | Mesoendemic (minimal)                                                      | 2011                          | 0.4<br>(0.1–2.5)                         | 60–89                                    |
| Ogouda & Sombo                      | Tchamba    | Hyperendemic (reference)                                                   | 2015                          | 3.5<br>(1.2–9.7)                         | 60–89                                    |
| Soukounde                           | Tchamba    | Mesoendemic (minimal)                                                      | 2011                          | 0.0<br>(0.0–4.2)                         | 60–89                                    |
| Talaba                              | Tchamba    | Mesoendemic (minimal)                                                      | 2011                          | 0.0<br>(0.0–2.7)                         | 60–89                                    |
| Kpaza Koue River Basin              |            |                                                                            |                               |                                          |                                          |
| Takade                              | Sotouboua  | Hyperendemic (minimal)                                                     | 2015                          | 14.5<br>(10.7–19.2)                      | <5                                       |

**Table S23. Villages in Plateaux not included in the special intervention zone (non-SIZ)**

| Village                          | Prefecture | Modelled prevalence trends followed by villages<br>(intervention scenario) | Latest parasitological survey |                                          | EOT probability (%) if MDA stops in 2027 |
|----------------------------------|------------|----------------------------------------------------------------------------|-------------------------------|------------------------------------------|------------------------------------------|
|                                  |            |                                                                            | Year                          | Microfilarial prevalence (%)<br>(95% CI) |                                          |
| Amou River Basin (Mono)          |            |                                                                            |                               |                                          |                                          |
| Amoutchou                        | Ogou       | Hyperendemic (enhanced) under biannual CDTI since 2014                     | 2012                          | 1.5<br>(0.5–4.4)                         | 60–89                                    |
| Amouto (Amou-Oblo)               | Haho       | Hyperendemic (reference) under biannual CDTI since 2014                    | 2012                          | 2.7<br>(1.1–6.0)                         | 5–19                                     |
| Atinkpassa                       | Ogou       | Hyperendemic (reference) under biannual CDTI since 2014                    | 2017                          | 3.4<br>(1.2–9.6)                         | 5–19                                     |
| Glelou & Omouva                  | Amou       | Hyperendemic (enhanced) under biannual CDTI since 2014                     | 2011                          | 1.3<br>(0.5–3.8)                         | 60–89                                    |
| Igbowou-Amou <sup>a</sup>        | Amou       | Hyperendemic (minimal) under biannual CDTI since 2014                      | 2017                          | 6.9<br>(3.2–14.2)                        | <5                                       |
| Ilekohan                         | Ogou       | Hyperendemic (enhanced) under biannual CDTI since 2014                     | 2012                          | 1.2<br>(0.3–4.2)                         | 60–89                                    |
| Kpati Copé <sup>a</sup>          | Amou       | Hyperendemic (minimal) under biannual CDTI since 2014                      | 2017                          | 6.7<br>(3.1–13.9)                        | <5                                       |
| Tsokple or Tchokple <sup>a</sup> | Amou       | Hyperendemic (minimal) under biannual CDTI since 2014                      | 2017                          | 12.4<br>(7.2–20.4)                       | <5                                       |
| Anié River Basin (Mono)          |            |                                                                            |                               |                                          |                                          |
| Atewe-Zongo                      | Anié       | Hyperendemic (enhanced) under annual CDTI                                  | 2015                          | 0.5<br>(0.1–2.9)                         | 60–89                                    |
| Pidina                           | Amou       | Hyperendemic (enhanced) under biannual CDTI since 2014                     | 2014                          | 0.7<br>(0.1–3.6)                         | 60–89                                    |
| Tchékélé                         | Ogou       | Hyperendemic (enhanced) under biannual CDTI since 2014                     | 2013                          | 0.5<br>(0.1–3.0)                         | 60–89                                    |

<sup>a</sup>Anti-OvAg seroprevalence in children under 15 years of age was 52.9% (9/17) in Igbowou-Amou, 60% (15/25) in Kpati Copé, and 48.4% (15/31) in Tsokple [14].



Table S23. Continued

| Village                                     | Prefecture | Modelled prevalence trends followed by villages<br>(intervention scenario) | Latest parasitological survey |                                          | EOT probability (%) if MDA stops in 2027 |
|---------------------------------------------|------------|----------------------------------------------------------------------------|-------------------------------|------------------------------------------|------------------------------------------|
|                                             |            |                                                                            | Year                          | Microfilarial prevalence (%)<br>(95% CI) |                                          |
| Deveho River Basin (Mono) / Zio River Basin |            |                                                                            |                               |                                          |                                          |
| Tutu Zionou <sup>a</sup>                    | Kpélé      | Hyperendemic (reference)<br>under annual CDTI                              | 2017                          | 2.5<br>(0.7–8.8)                         | <5                                       |
| Menou (or Menu) River Basin                 |            |                                                                            |                               |                                          |                                          |
| Ahlon Dzindzi                               | Wawa       | Mesoendemic (minimal)<br>under annual CDTI                                 | 2008                          | 0.5<br>(0.1–2.8)                         | 60–89                                    |
| Denou Bumuebi                               | Danyi      | Hyperendemic (enhanced)<br>under biannual CDTI since 2014                  | 2008                          | 2.2<br>(0.7–6.2)                         | 60–89                                    |
| Guin Kopé                                   | Wawa       | Hyperendemic (reference)<br>under annual CDTI                              | 2008                          | 5.3<br>(3.3–8.4)                         | <5                                       |
| Odomi Abra                                  | Wawa       | Hyperendemic (reference)<br>under annual CDTI                              | 2008                          | 6.7<br>(4.2–10.6)                        | <5                                       |
| S. Outouala                                 | Danyi      | Hyperendemic (enhanced)<br>under biannual CDTI since 2014                  | 2008                          | 3.6<br>(1.7–7.8)                         | 60–89                                    |
| Mono River Basin                            |            |                                                                            |                               |                                          |                                          |
| Glive                                       | Ogou       | Hyperendemic (enhanced)<br>under biannual CDTI since 2014                  | 2012                          | 2.4<br>(0.7–8.5)                         | 60–89                                    |
| Hetre                                       | Ogou       | Hyperendemic (enhanced)<br>under biannual CDTI since 2014                  | 2012                          | 0.6<br>(0.1–3.2)                         | 60–89                                    |
| Moba Kopé                                   | Ogou       | Hyperendemic (enhanced)<br>under biannual CDTI since 2014                  | 2013                          | 1.2<br>(0.3–4.2)                         | 60–89                                    |
| Tanago                                      | Ogou       | Hyperendemic (enhanced)<br>under biannual CDTI since 2014                  | 2012                          | 1.1<br>(0.2–6.0)                         | 60–89                                    |
| Toigbo                                      | Ogou       | Hyperendemic (enhanced)<br>under biannual CDTI since 2014                  | 2005                          | 6.9<br>(4.5–10.5)                        | 60–89                                    |

<sup>a</sup>The only other surveyed village (Kouma-Kunda) from the Deveho (Mono) River Basin was classified as hypoendemic at baseline. In contrast to the model projections followed by most of the other hypoendemic villages in Plateaux, this village recorded a microfilarial prevalence of 1.3% (95%CI: 0.2–5.2%) in 2014 [8].

Table S23. Continued

| Village                       | Prefecture | Modelled prevalence trends followed by villages<br>(intervention scenario) | Latest parasitological survey |                                          | EOT probability (%) if MDA stops in 2027 |
|-------------------------------|------------|----------------------------------------------------------------------------|-------------------------------|------------------------------------------|------------------------------------------|
|                               |            |                                                                            | Year                          | Microfilarial prevalence (%)<br>(95% CI) |                                          |
| Todje (or Todzie) River Basin |            |                                                                            |                               |                                          |                                          |
| Ananivikodzi                  | Agou       | Hyperendemic (enhanced)<br>under annual CDTI                               | 2000                          | 0.0<br>0.0–8.8)                          | 60–89                                    |
| Klo-Mayondi                   | Kloto      | Hyperendemic (reference)<br>under annual CDTI                              | 2000                          | 16.4<br>(12.5–21.3)                      | <5                                       |
| Kpime-Seva (Tététou)          | Kloto      | Hyperendemic (reference)<br>under annual CDTI                              | 2000                          | 12.5<br>(8.6–17.6)                       | <5                                       |
| Nyive                         | Kloto      | Hyperendemic (reference)<br>under annual CDTI                              | 2004                          | 7.1<br>(4.1–12.0)                        | <5                                       |
| Tome                          | Agou       | Mesoendemic (minimal)<br>under annual CDTI                                 | 2001                          | 4.3<br>(2.4–7.5)                         | 60–89                                    |
| Wawa/Asukawkaw River Basin    |            |                                                                            |                               |                                          |                                          |
| Sukul-Kpodji                  | Wawa       | Hyperendemic (enhanced)<br>under annual CDTI                               | 2014                          | 0.7<br>(0.1–4.1)                         | 60–89                                    |

**Table S24. Villages in Maritime not included in the special intervention zone (non-SIZ)**

| Village                 | Prefecture | Modelled prevalence trends followed by villages<br>(intervention scenario) | Latest parasitological survey |                                          | EOT probability (%) if MDA stops in 2027 |
|-------------------------|------------|----------------------------------------------------------------------------|-------------------------------|------------------------------------------|------------------------------------------|
|                         |            |                                                                            | Year                          | Microfilarial prevalence (%)<br>(95% CI) |                                          |
| Haho River Basin (Mono) |            |                                                                            |                               |                                          |                                          |
| Afangadji <sup>a</sup>  | Yoto       | Hyperendemic (enhanced)                                                    | 2017                          | 1.3<br>(0.2–7.1)                         | 60–89                                    |
| Togba                   | Yoto       | Hyperendemic (enhanced)                                                    | 2015                          | 0.6<br>(0.1–3.5)                         | 60–89                                    |
| Mono River Basin        |            |                                                                            |                               |                                          |                                          |
| Afomonou                | Bas-Mono   | Mesoendemic (minimal)                                                      | 2012                          | 0.9<br>(0.2–4.9)                         | 60–89                                    |
| Dzrekpon/Djrekpon       | Yoto       | Hyperendemic (enhanced)                                                    | 2015                          | 1.6<br>(0.3–8.9)                         | 60–89                                    |
| Gbandidi                | Bas-Mono   | Mesoendemic (minimal)                                                      | 2012                          | 0.6<br>(0.1–3.1)                         | 60–89                                    |
| Gogokondji              | Yoto       | Hyperendemic (enhanced)                                                    | 2017                          | 0.0<br>(0.0–9.6)                         | 60–89                                    |
| Lakata-Kondji           | Yoto       | Hyperendemic (enhanced)                                                    | 2015                          | 0.0<br>(0.0–5.7)                         | 60–89                                    |
| Mawussou                | Yoto       | Hyperendemic (enhanced)                                                    | 2015                          | 1.2<br>(0.2–6.7)                         | 60–89                                    |
| Zio River Basin         |            |                                                                            |                               |                                          |                                          |
| Afokonou                | Zio        | Mesoendemic (minimal)                                                      | 2015                          | 0.0<br>(0.0–5.7)                         | 60–89                                    |
| Kayido                  | Avé        | Hyperendemic (reference) or Hyperendemic (enhanced)                        | 2012                          | 3.6<br>(1.0–12.3)                        | <5<br>or<br>60–89                        |
| Konta & Agbatehi        | Avé        | Hyperendemic (enhanced)                                                    | 2012                          | 2.4<br>(1.0–5.4)                         | 60–89                                    |

CDTI: Community-directed treatment with ivermectin.

<sup>a</sup>In 2020–2023, stop-MDA surveys in Afangadji indicated active transmission [15].

## Text S9. Calculation of prefecture-level likelihood of reaching elimination of onchocerciasis transmission

The term “likelihood” is employed here as a categorical variable (‘very likely’, ‘likely’, ‘possibly’, ‘unlikely’ and ‘very unlikely’) to denote the range of joint elimination of transmission (EOT) probabilities, rather than referring to the formal statistical notion of likelihood used in inferential analyses. To calculate the likelihood of reaching EOT for each prefecture, we multiplied village-level EOT probabilities (for surveyed villages) using midpoint values across the village-level EOT probability ranges (Table S25).

**Table S25. Assigned midpoint values for village-level EOT probability ranges**

| EOT probability range per village (%) | Midpoint value (%) |
|---------------------------------------|--------------------|
| <5                                    | 2.5                |
| 5–19                                  | 12.0               |
| 20–59                                 | 39.5               |
| 60–89                                 | 74.5               |
| ≥90                                   | 100.0 <sup>a</sup> |

<sup>a</sup>For the ≥90% EOT probability, a value of 100.0 was used in the calculation of the prefecture-level EOT likelihood. Most villages projected to reach ≥90% EOT probabilities have values close to 100%; therefore, this approach prevents underestimating the overall likelihood in prefectures that have many villages with high EOT probabilities.

Each village's midpoint was used to calculate the joint EOT probability for the entire prefecture, by multiplying the midpoint probabilities (Table S25) of *all* surveyed villages within that prefecture (i.e., with or without recorded baseline microfilarial prevalence). This approach assumes independence of EOT probabilities across villages within prefectures, and across prefectures, as EPIONCHO-IBM models closed populations (i.e., not considering movement between villages or prefectures of humans or flies),

$$P_j = \prod_{i=1}^{i=n_j} P_{i,j}$$

Where  $P_j$  is the joint EOT probability for prefecture  $j$  ( $j = 1, \dots, 34$ ) and  $P_{i,j}$  the midpoint EOT probability for village  $i$  in prefecture  $j$ . The calculated joint EOT probabilities for each prefecture were assigned to one of the five likelihood categories (Table S26).

**Table S26. Definitions of prefecture-level EOT likelihood categories**

| EOT likelihood category | Probability range | Description                                                                                                                   |
|-------------------------|-------------------|-------------------------------------------------------------------------------------------------------------------------------|
| Very likely             | ≥90.00%           | Very high probability of reaching EOT, with all surveyed villages being projected to reach ≥90% EOT probability               |
| Likely                  | 50.00–89.99%      | High probability of reaching EOT, with most surveyed villages being projected to reach ≥90% EOT probability                   |
| Possibly                | 5.00–49.99%       | Moderate probability of reaching EOT, with most surveyed villages being projected to reach at least 60–89% EOT probability    |
| Unlikely                | 0.01–4.99%        | Low probability of reaching EOT, reflecting the presence of surveyed villages with projected <20% EOT probability             |
| Very unlikely           | <0.01%            | Very low probability of reaching EOT, indicating the presence of several surveyed villages with projected <5% EOT probability |

Tables S27-S29 present prefecture-specific EOT likelihood categories when simulating that ivermectin MDA stops in 2024, 2027 or 2030, indicating the total number of surveyed villages per prefecture and the number of villages for each midpoint value. Extending treatment to 2027 slightly improves the EOT likelihood for the prefectures in Kara, although it does only alter the overall likelihood categories for Doufelgou from ‘Unlikely’ to ‘Possibly’ and for Binah (from ‘Possibly’ to ‘Likely’) (Table S28). Extending treatment to 2030 increases somewhat the EOT likelihood for Dankpen prefecture (from ‘Very unlikely’ to ‘Unlikely’) (Table S29). Under biannual MDA, extending treatment to 2030 improves the likelihood for Plateaux prefectures, with Haho and Ogou prefectures changing from ‘Unlikely’ to ‘Possibly’, and with Danyi prefecture changing from ‘Possibly’ to ‘Very likely’. The villages within each prefecture with projected EOT probabilities <90% if MDA stops in 2027 are presented in Tables S13-S18 (for villages with recorded BMP estimates) and Tables S19-S24 (for those without recorded BMP estimates). As the calculation of joint EOT probabilities is strongly dependent on the number of surveyed villages in each prefecture, Figure 7 of the Main Text also shows, as pie-charts, the proportions of surveyed villages in each prefecture according to their projected EOT probability ranges if ivermectin MDA stops in 2027. The size of the pie-charts reflects the number of surveyed villages.

**Table S27. Prefecture-level likelihood of reaching EOT when simulating that ivermectin MDA stops in 2024**

| Region<br>Prefecture                  | No.<br>villages | Midpoint value (%)<br>(EOT probability range per village, %) |                  |                   |                   |                 | Joint EOT probability<br>(%) | EOT<br>likelihood<br>category |
|---------------------------------------|-----------------|--------------------------------------------------------------|------------------|-------------------|-------------------|-----------------|------------------------------|-------------------------------|
|                                       |                 | 2.5%<br>(<5%)                                                | 12.0%<br>(5–19%) | 39.5%<br>(20–59%) | 74.5%<br>(60–89%) | 100.0<br>(≥90%) |                              |                               |
| Savanes                               |                 |                                                              |                  |                   |                   |                 |                              |                               |
| Kpendjal, including<br>Kpendjal-Ouest | 9               | 0                                                            | 0                | 3                 | 5                 | 1               | 1.4                          | Unlikely                      |
| Oti, including Oti-<br>Sud            | 29              | 3                                                            | 0                | 2                 | 7                 | 17              | <0.01                        | Very<br>unlikely              |
| Tandjoaré or<br>Tandjouaré            | 5               | 0                                                            | 0                | 0                 | 1                 | 4               | 74.5                         | Likely                        |
| Tône, including<br>Cinkassé           | 6               | 0                                                            | 0                | 2                 | 0                 | 4               | 15.6                         | Possibly                      |
| Kara                                  |                 |                                                              |                  |                   |                   |                 |                              |                               |
| Assoli                                | 3               | 0                                                            | 0                | 0                 | 0                 | 3               | ≥90                          | Very likely                   |
| Bassar                                | 17              | 2                                                            | 8                | 0                 | 0                 | 7               | <0.01                        | Very<br>unlikely              |
| Binah or Bimah                        | 4               | 0                                                            | 0                | 1                 | 0                 | 3               | 39.5                         | Possibly                      |
| Dankpen                               | 19              | 2                                                            | 3                | 1                 | 1                 | 12              | <0.01                        | Very<br>unlikely              |
| Doufelgou                             | 5               | 0                                                            | 1                | 2                 | 1                 | 1               | 1.4                          | Unlikely                      |
| Kéran                                 | 13              | 10                                                           | 3                | 0                 | 0                 | 0               | <0.01                        | Very<br>unlikely              |
| Kozah                                 | 27              | 1                                                            | 2                | 0                 | 1                 | 23              | 0.03                         | Unlikely                      |

Table S27. Continued

| Region<br>Prefecture       | No.<br>villages | Midpoint value (%)<br>(EOT probability range per village, %) |                  |                   |                   |                          | Joint EOT probability<br>(%) | EOT<br>likelihood<br>category |
|----------------------------|-----------------|--------------------------------------------------------------|------------------|-------------------|-------------------|--------------------------|------------------------------|-------------------------------|
|                            |                 | 2.5%<br>( $<5\%$ )                                           | 12.0%<br>(5–19%) | 39.5%<br>(20–59%) | 74.5%<br>(60–89%) | 100.0<br>( $\geq 90\%$ ) |                              |                               |
| Centrale                   |                 |                                                              |                  |                   |                   |                          |                              |                               |
| Blitta                     | 28              | 0                                                            | 0                | 0                 | 10                | 18                       | 5.3                          | Possibly                      |
| Sotouboua,<br>including Mô | 34              | 7                                                            | 3                | 0                 | 14                | 10                       | $<0.01$                      | Very<br>unlikely              |
| Tchamba                    | 16              | 0                                                            | 0                | 0                 | 7                 | 9                        | 12.7                         | Possibly                      |
| Tchaoudjo or<br>Tchaudjo   | 8               | 0                                                            | 1                | 0                 | 2                 | 5                        | 6.7                          | Possibly                      |
| Plateaux                   |                 |                                                              |                  |                   |                   |                          |                              |                               |
| Agou                       | 13              | 0                                                            | 0                | 0                 | 3                 | 10                       | 30.8                         | Possibly                      |
| Akébou                     | 2               | 0                                                            | 0                | 0                 | 1                 | 1                        | 74.5                         | Likely                        |
| Amou                       | 8               | 3                                                            | 0                | 0                 | 3                 | 2                        | $<0.01$                      | Very<br>unlikely              |
| Anié                       | 12              | 0                                                            | 0                | 0                 | 3                 | 9                        | 41.4                         | Possibly                      |
| Danyi                      | 5               | 0                                                            | 0                | 0                 | 2                 | 3                        | 55.5                         | Likely                        |
| Est-Mono                   | 15              | 0                                                            | 0                | 0                 | 4                 | 11                       | 30.8                         | Possibly                      |
| Haho                       | 21              | 0                                                            | 3                | 0                 | 3                 | 15                       | 0.07                         | Unlikely                      |
| Kloto                      | 5               | 3                                                            | 0                | 0                 | 0                 | 2                        | $<0.01$                      | Very<br>unlikely              |

Table S27. Continued

| Region<br>Prefecture                                             | No.<br>villages | Midpoint value (%)<br>(EOT probability range per village, %) |                  |                   |                   |                          | Joint EOT probability<br>(%) | EOT<br>likelihood<br>category |
|------------------------------------------------------------------|-----------------|--------------------------------------------------------------|------------------|-------------------|-------------------|--------------------------|------------------------------|-------------------------------|
|                                                                  |                 | 2.5%<br>( $<5\%$ )                                           | 12.0%<br>(5–19%) | 39.5%<br>(20–59%) | 74.5%<br>(60–89%) | 100.0<br>( $\geq 90\%$ ) |                              |                               |
| Plateaux (continued)                                             |                 |                                                              |                  |                   |                   |                          |                              |                               |
| Kpélé                                                            | 2               | 1                                                            | 0                | 0                 | 0                 | 1                        | 2.5                          | Unlikely                      |
| Moyen-Mono                                                       | 6               | 0                                                            | 0                | 0                 | 4                 | 2                        | 30.8                         | Possibly                      |
| Ogou                                                             | 37              | 0                                                            | 2                | 0                 | 16                | 19                       | 0.01                         | Unlikely                      |
| Wawa                                                             | 10              | 2                                                            | 0                | 0                 | 4                 | 4                        | 0.02                         | Unlikely                      |
| Maritime                                                         |                 |                                                              |                  |                   |                   |                          |                              |                               |
| Avé <sup>a</sup>                                                 | 5               | 0                                                            | 0                | 1                 | 1                 | 3                        | 29.4                         | Possibly                      |
| Bas-Mono, includes<br>areas previously<br>from Lacs <sup>a</sup> | 2               | 0                                                            | 0                | 0                 | 2                 | 0                        | 55.5                         | Likely                        |
| Golfe, including<br>Lomé and Agoè-<br>Nyivé <sup>a</sup>         | 0               | 0                                                            | 0                | 0                 | 0                 | 0                        | –                            | Non-<br>endemic               |
| Lacs <sup>b</sup>                                                | 0               | 0                                                            | 0                | 0                 | 0                 | 0                        | –                            | Non-<br>endemic               |
| Vo <sup>a</sup>                                                  | 0               | 0                                                            | 0                | 0                 | 0                 | 0                        | –                            | Non-<br>endemic               |
| Yoto <sup>a</sup>                                                | 22              | 0                                                            | 0                | 4                 | 3                 | 15                       | 1.0                          | Unlikely                      |
| Zio <sup>a</sup>                                                 | 12              | 0                                                            | 0                | 0                 | 1                 | 11                       | 74.5                         | Likely                        |

<sup>a</sup>In all of Maritime, excepting the endemic villages in the Haho River Basin (Mono) of Yoto Prefecture, control interventions may have stopped earlier than 2024 [15].



**Table S28. Prefecture-level likelihood of reaching EOT when simulating that ivermectin MDA stops in 2027**

| Region<br>Prefecture                  | No.<br>villages | Midpoint value (%)<br>(EOT probability range per village, %) |                  |                   |                   |                          | Joint EOT probability<br>(%) | EOT<br>likelihood<br>category |
|---------------------------------------|-----------------|--------------------------------------------------------------|------------------|-------------------|-------------------|--------------------------|------------------------------|-------------------------------|
|                                       |                 | 2.5%<br>( $<5\%$ )                                           | 12.0%<br>(5–19%) | 39.5%<br>(20–59%) | 74.5%<br>(60–89%) | 100.0<br>( $\geq 90\%$ ) |                              |                               |
| Savanes                               |                 |                                                              |                  |                   |                   |                          |                              |                               |
| Kpendjal, including<br>Kpendjal-Ouest | 9               | 0                                                            | 0                | 3                 | 5                 | 1                        | 1.4                          | Unlikely                      |
| Oti, including Oti-<br>Sud            | 29              | 3                                                            | 0                | 2                 | 7                 | 17                       | $<0.01$                      | Very<br>unlikely              |
| Tandjoaré or<br>Tandjouaré            | 5               | 0                                                            | 0                | 0                 | 1                 | 4                        | 74.5                         | Likely                        |
| Tône, including<br>Cinkassé           | 6               | 0                                                            | 0                | 2                 | 0                 | 4                        | 15.6                         | Possibly                      |
| Kara                                  |                 |                                                              |                  |                   |                   |                          |                              |                               |
| Assoli                                | 3               | 0                                                            | 0                | 0                 | 0                 | 3                        | $\geq 90$                    | Very likely                   |
| Bassar                                | 17              | 2                                                            | 6                | 0                 | 2                 | 7                        | $<0.01$                      | Very<br>unlikely              |
| Binah or Bimah                        | 4               | 0                                                            | 0                | 0                 | 1                 | 3                        | 74.5                         | Likely                        |
| Dankpen                               | 19              | 2                                                            | 3                | 0                 | 1                 | 13                       | $<0.01$                      | Very<br>unlikely              |
| Doufelgou                             | 5               | 0                                                            | 1                | 0                 | 2                 | 2                        | 6.7                          | Possibly                      |
| Kéran                                 | 13              | 10                                                           | 3                | 0                 | 0                 | 0                        | $<0.01$                      | Very<br>unlikely              |
| Kozah                                 | 27              | 1                                                            | 2                | 0                 | 0                 | 24                       | 0.04                         | Unlikely                      |

Table S28. Continued

| Region<br>Prefecture       | No.<br>villages | Midpoint value (%)<br>(EOT probability range per village, %) |                  |                   |                   |                          | Joint EOT probability<br>(%) | EOT<br>likelihood<br>category |
|----------------------------|-----------------|--------------------------------------------------------------|------------------|-------------------|-------------------|--------------------------|------------------------------|-------------------------------|
|                            |                 | 2.5%<br>( $<5\%$ )                                           | 12.0%<br>(5–19%) | 39.5%<br>(20–59%) | 74.5%<br>(60–89%) | 100.0<br>( $\geq 90\%$ ) |                              |                               |
| Centrale                   |                 |                                                              |                  |                   |                   |                          |                              |                               |
| Blitta                     | 28              | 0                                                            | 0                | 0                 | 10                | 18                       | 5.3                          | Possibly                      |
| Sotouboua,<br>including Mô | 34              | 7                                                            | 3                | 0                 | 14                | 10                       | $<0.01$                      | Very<br>unlikely              |
| Tchamba                    | 16              | 0                                                            | 0                | 0                 | 7                 | 9                        | 12.7                         | Possibly                      |
| Tchaoudjo or<br>Tchaudjo   | 8               | 0                                                            | 1                | 0                 | 2                 | 5                        | 6.7                          | Possibly                      |
| Plateaux                   |                 |                                                              |                  |                   |                   |                          |                              |                               |
| Agou                       | 13              | 0                                                            | 0                | 0                 | 3                 | 10                       | 30.8                         | Possibly                      |
| Akébou                     | 2               | 0                                                            | 0                | 0                 | 1                 | 1                        | 74.5                         | Likely                        |
| Amou                       | 8               | 3                                                            | 0                | 0                 | 3                 | 2                        | $<0.01$                      | Very<br>unlikely              |
| Anié                       | 12              | 0                                                            | 0                | 0                 | 3                 | 9                        | 41.4                         | Possibly                      |
| Danyi                      | 5               | 0                                                            | 0                | 0                 | 2                 | 3                        | 55.5                         | Likely                        |
| Est-Mono                   | 15              | 0                                                            | 0                | 0                 | 4                 | 11                       | 30.8                         | Possibly                      |
| Haho                       | 21              | 0                                                            | 3                | 0                 | 3                 | 15                       | 0.07                         | Unlikely                      |
| Kloto                      | 5               | 3                                                            | 0                | 0                 | 0                 | 2                        | $<0.01$                      | Very<br>unlikely              |

Table S28. Continued

| Region<br>Prefecture                                             | No.<br>villages | Midpoint value (%)<br>(EOT probability range per village, %) |                  |                   |                   |                          | Joint EOT probability<br>(%) | EOT<br>likelihood<br>category |
|------------------------------------------------------------------|-----------------|--------------------------------------------------------------|------------------|-------------------|-------------------|--------------------------|------------------------------|-------------------------------|
|                                                                  |                 | 2.5%<br>( $<5\%$ )                                           | 12.0%<br>(5–19%) | 39.5%<br>(20–59%) | 74.5%<br>(60–89%) | 100.0<br>( $\geq 90\%$ ) |                              |                               |
| Plateaux (continued)                                             |                 |                                                              |                  |                   |                   |                          |                              |                               |
| Kpélé                                                            | 2               | 1                                                            | 0                | 0                 | 0                 | 1                        | 2.5                          | Unlikely                      |
| Moyen-Mono                                                       | 6               | 0                                                            | 0                | 0                 | 4                 | 2                        | 30.8                         | Possibly                      |
| Ogou                                                             | 37              | 0                                                            | 2                | 0                 | 16                | 19                       | 0.01                         | Unlikely                      |
| Wawa                                                             | 10              | 2                                                            | 0                | 0                 | 4                 | 4                        | 0.02                         | Unlikely                      |
| Maritime                                                         |                 |                                                              |                  |                   |                   |                          |                              |                               |
| Avé <sup>a</sup>                                                 | 5               | 0                                                            | 0                | 1                 | 1                 | 3                        | 29.4                         | Possibly                      |
| Bas-Mono, includes<br>areas previously<br>from Lacs <sup>a</sup> | 2               | 0                                                            | 0                | 0                 | 2                 | 0                        | 55.5                         | Likely                        |
| Golfe, including<br>Lomé and Agoè-<br>Nyivé <sup>a</sup>         | 0               | 0                                                            | 0                | 0                 | 0                 | 0                        | –                            | Non-<br>endemic               |
| Lacs <sup>a</sup>                                                | 0               | 0                                                            | 0                | 0                 | 0                 | 0                        | –                            | Non-<br>endemic               |
| Vo <sup>a</sup>                                                  | 0               | 0                                                            | 0                | 0                 | 0                 | 0                        | –                            | Non-<br>endemic               |
| Yoto <sup>a</sup>                                                | 22              | 0                                                            | 0                | 4                 | 3                 | 15                       | 1.0                          | Unlikely                      |
| Zio <sup>a</sup>                                                 | 12              | 0                                                            | 0                | 0                 | 1                 | 11                       | 74.5                         | Likely                        |

<sup>a</sup>In all of Maritime, excepting the endemic villages in the Haho River Basin (Mono) of Yoto Prefecture, control interventions may have stopped earlier than 2024 [15].

**Table S29. Prefecture-level likelihood of reaching EOT when simulating that ivermectin MDA stops in 2030**

| Region<br>Prefecture                  | No.<br>villages | Midpoint value (%)<br>(EOT probability range per village, %) |                  |                   |                   |                 | Joint EOT probability<br>(%) | EOT<br>likelihood<br>category |
|---------------------------------------|-----------------|--------------------------------------------------------------|------------------|-------------------|-------------------|-----------------|------------------------------|-------------------------------|
|                                       |                 | 2.5%<br>(<5%)                                                | 12.0%<br>(5–19%) | 39.5%<br>(20–59%) | 74.5%<br>(60–89%) | 100.0<br>(≥90%) |                              |                               |
| Savanes                               |                 |                                                              |                  |                   |                   |                 |                              |                               |
| Kpendjal, including<br>Kpendjal-Ouest | 9               | 0                                                            | 0                | 3                 | 5                 | 1               | 1.4                          | Unlikely                      |
| Oti, including Oti-<br>Sud            | 29              | 3                                                            | 0                | 2                 | 7                 | 17              | <0.01                        | Very<br>unlikely              |
| Tandjoaré or<br>Tandjouaré            | 5               | 0                                                            | 0                | 0                 | 1                 | 4               | 74.5                         | Likely                        |
| Tône, including<br>Cinkassé           | 6               | 0                                                            | 0                | 2                 | 0                 | 4               | 15.6                         | Possibly                      |
| Kara                                  |                 |                                                              |                  |                   |                   |                 |                              |                               |
| Assoli                                | 3               | 0                                                            | 0                | 0                 | 0                 | 3               | ≥90                          | Very likely                   |
| Bassar                                | 17              | 2                                                            | 0                | 6                 | 2                 | 7               | <0.01                        | Very<br>unlikely              |
| Binah or Bimah                        | 4               | 0                                                            | 0                | 0                 | 1                 | 3               | 74.5                         | Likely                        |
| Dankpen                               | 19              | 2                                                            | 0                | 3                 | 1                 | 13              | 0.01                         | Unlikely                      |
| Doufelgou                             | 5               | 0                                                            | 0                | 1                 | 2                 | 2               | 19.2                         | Possibly                      |
| Kéran                                 | 13              | 10                                                           | 0                | 3                 | 0                 | 0               | <0.01                        | Very<br>unlikely              |
| Kozah                                 | 27              | 1                                                            | 0                | 2                 | 0                 | 24              | 0.30                         | Unlikely                      |

Table S29. Continued

| Region<br>Prefecture       | No.<br>villages | Midpoint value (%)<br>(EOT probability range per village, %) |                                   |                                    |                                    |                                  | Joint EOT probability<br>(%) | EOT<br>likelihood<br>category |
|----------------------------|-----------------|--------------------------------------------------------------|-----------------------------------|------------------------------------|------------------------------------|----------------------------------|------------------------------|-------------------------------|
|                            |                 | 2.5%<br>( <small>&lt;5%</small> )                            | 12.0%<br>( <small>5–19%</small> ) | 39.5%<br>( <small>20–59%</small> ) | 74.5%<br>( <small>60–89%</small> ) | 100.0<br>( <small>≥90%</small> ) |                              |                               |
| Centrale                   |                 |                                                              |                                   |                                    |                                    |                                  |                              |                               |
| Blitta                     | 28              | 0                                                            | 0                                 | 0                                  | 10                                 | 18                               | 5.3                          | Possibly                      |
| Sotouboua,<br>including Mô | 34              | 7                                                            | 0                                 | 3                                  | 14                                 | 10                               | <0.01                        | Very<br>unlikely              |
| Tchamba                    | 16              | 0                                                            | 0                                 | 0                                  | 7                                  | 9                                | 12.7                         | Possibly                      |
| Tchaoudjo or<br>Tchaudjo   | 8               | 0                                                            | 1                                 | 0                                  | 2                                  | 5                                | 6.7                          | Possibly                      |
| Plateaux                   |                 |                                                              |                                   |                                    |                                    |                                  |                              |                               |
| Agou                       | 13              | 0                                                            | 0                                 | 0                                  | 3                                  | 10                               | 30.8                         | Possibly                      |
| Akébou                     | 2               | 0                                                            | 0                                 | 0                                  | 1                                  | 1                                | 74.5                         | Likely                        |
| Amou                       | 8               | 3                                                            | 0                                 | 0                                  | 0                                  | 5                                | <0.01                        | Very<br>unlikely              |
| Anié                       | 12              | 0                                                            | 0                                 | 0                                  | 3                                  | 9                                | 41.4                         | Possibly                      |
| Danyi                      | 5               | 0                                                            | 0                                 | 0                                  | 0                                  | 5                                | ≥90                          | Very likely                   |
| Est-Mono                   | 15              | 0                                                            | 0                                 | 0                                  | 4                                  | 11                               | 30.8                         | Possibly                      |
| Haho                       | 21              | 0                                                            | 0                                 | 3                                  | 0                                  | 18                               | 6.2                          | Possibly                      |
| Kloto                      | 5               | 3                                                            | 0                                 | 0                                  | 0                                  | 2                                | <0.01                        | Very<br>unlikely              |

Table S29. Continued

| Region<br>Prefecture                                             | No.<br>villages | Midpoint value (%)<br>(EOT probability range per village, %) |                  |                   |                   |                          | Joint EOT probability<br>(%) | EOT<br>likelihood<br>category |
|------------------------------------------------------------------|-----------------|--------------------------------------------------------------|------------------|-------------------|-------------------|--------------------------|------------------------------|-------------------------------|
|                                                                  |                 | 2.5%<br>( $<5\%$ )                                           | 12.0%<br>(5–19%) | 39.5%<br>(20–59%) | 74.5%<br>(60–89%) | 100.0<br>( $\geq 90\%$ ) |                              |                               |
| Plateaux (continued)                                             |                 |                                                              |                  |                   |                   |                          |                              |                               |
| Kpélé                                                            | 2               | 1                                                            | 0                | 0                 | 0                 | 1                        | 2.5                          | Unlikely                      |
| Moyen-Mono                                                       | 6               | 0                                                            | 0                | 0                 | 4                 | 2                        | 30.8                         | Possibly                      |
| Ogou                                                             | 37              | 0                                                            | 0                | 2                 | 0                 | 35                       | 15.6                         | Possibly                      |
| Wawa                                                             | 10              | 2                                                            | 0                | 0                 | 4                 | 4                        | 0.02                         | Unlikely                      |
| Maritime                                                         |                 |                                                              |                  |                   |                   |                          |                              |                               |
| Avé <sup>a</sup>                                                 | 5               | 0                                                            | 0                | 1                 | 1                 | 3                        | 29.4                         | Possibly                      |
| Bas-Mono, includes<br>areas previously<br>from Lacs <sup>a</sup> | 2               | 0                                                            | 0                | 0                 | 2                 | 0                        | 55.5                         | Likely                        |
| Golfe, including<br>Lomé and Agoè-<br>Nyivé <sup>a</sup>         | 0               | 0                                                            | 0                | 0                 | 0                 | 0                        | –                            | Non-<br>endemic               |
| Lacs <sup>a</sup>                                                | 0               | 0                                                            | 0                | 0                 | 0                 | 0                        | –                            | Non-<br>endemic               |
| Vo <sup>a</sup>                                                  | 0               | 0                                                            | 0                | 0                 | 0                 | 0                        | –                            | Non-<br>endemic               |
| Yoto <sup>a</sup>                                                | 22              | 0                                                            | 0                | 4                 | 3                 | 15                       | 1.0                          | Unlikely                      |
| Zio <sup>a</sup>                                                 | 12              | 0                                                            | 0                | 0                 | 1                 | 11                       | 74.5                         | Likely                        |

<sup>a</sup>In all of Maritime, excepting the endemic villages in the Haho River Basin (Mono) of Yoto Prefecture, control interventions may have stopped earlier than 2024 [15].

## Reported ivermectin treatment coverage of total population (%) per region and prefecture from 1991 to 2018 in Togo

Table S30. Reported coverage (% of total population) of ivermectin MDA for 1991-2018 in Savanes

| Year | Prefecture |          |      |            |      |
|------|------------|----------|------|------------|------|
|      | Cinkassé   | Kpendjal | Oti  | Tandjouaré | Tône |
| 1991 | 0          | 0        | 0    | 0          | 0    |
| 1992 | 0          | 0        | 0    | 0          | 0    |
| 1993 | 0          | NA       | 0    | NA         | NA   |
| 1994 | 0          | NA       | 0    | NA         | NA   |
| 1995 | 0          | NA       | 82.1 | NA         | NA   |
| 1996 | 0          | NA       | NA   | NA         | NA   |
| 1997 | 0          | 0        | 0    | 0          | 0    |
| 1998 | 0          | NA       | NA   | NA         | NA   |
| 1999 | 0          | NA       | NA   | NA         | NA   |
| 2000 | 0          | 69.8     | 70.3 | 79.0       | 68.0 |
| 2001 | 72.7       | 69.1     | 73.5 | 77.6       | 73.1 |
| 2002 | NA         | 72.0     | 76.1 | 81.9       | 76.8 |
| 2003 | NA         | 70.3     | 74.6 | 77.7       | 75.5 |
| 2004 | NA         | 69.5     | 73.5 | 78.1       | 81.6 |
| 2005 | NA         | 69.5     | 73.5 | 78.1       | 83.4 |
| 2006 | NA         | 83.9     | 80.8 | 63.4       | 84.0 |
| 2007 | NA         | 83.7     | 83.9 | 83.6       | 84.4 |
| 2008 | NA         | 85.1     | 84.6 | 85.0       | 85.0 |
| 2009 | NA         | 85.1     | 84.9 | 85.7       | 84.1 |
| 2010 | NA         | 81.3     | 85.3 | 85.0       | 84.8 |
| 2011 | NA         | 85.0     | 83.7 | 85.4       | 79.8 |
| 2012 | NA         | 84.9     | 83.5 | 85.5       | 68.0 |
| 2013 | 80.5       | 83.0     | 80.8 | 85.9       | 82.6 |
| 2014 | 80.3       | 83.3     | 81.3 | 82.4       | 77.6 |
| 2015 | 81.7       | 85.1     | 82.2 | 83.0       | 81.5 |
| 2016 | 81.4       | 83.3     | 82.5 | 83.2       | 83.4 |
| 2017 | 81.7       | 82.3     | 80.7 | 79.2       | 82.7 |
| 2018 | 80.5       | 82.2     | 80.3 | 82.0       | 84.5 |

Some parts of Savanes may have started receiving ivermectin MDA in 1988-1990 [4]. Coverage data from [4,8].

**Table S31. Reported coverage (% of total population) of ivermectin MDA for 1991-2018 in Kara**

| Year | Prefecture |        |       |         |           |       |       |
|------|------------|--------|-------|---------|-----------|-------|-------|
|      | Assoli     | Bassar | Binah | Dankpen | Doufelgou | Kéran | Kozah |
| 1991 | 0          | 0      | 0     | 0       | 0         | 55.7  | 60.9  |
| 1992 | 65.2       | 63.5   | 68.2  | 0       | 65.9      | 59.6  | 71.5  |
| 1993 | 50.1       | 58.4   | 62.5  | 0       | 54.1      | 53.6  | 66.0  |
| 1994 | NA         | 64.4   | 71.2  | 0       | 66.4      | 59.3  | 61.4  |
| 1995 | 82.5       | 73.0   | 71.5  | 64.1    | 71.9      | 73.0  | 76.5  |
| 1996 | 73.7       | 73.8   | 75.8  | NA      | 77.4      | 75.5  | 82.6  |
| 1997 | 0          | 0      | 0     | 0       | 0         | 0     | 0     |
| 1998 | 83.9       | 79.8   | 87.7  | 80.4    | 81.8      | 71.8  | 75.9  |
| 1999 | 69.3       | 74.3   | 76.1  | 79.9    | 80.7      | 86.7  | 73.8  |
| 2000 | 66.4       | 69.4   | 79.3  | 75.5    | 77.8      | 77.5  | 75.6  |
| 2001 | 77.2       | 76.1   | 77.5  | 75.7    | 75.1      | 80.3  | 72.6  |
| 2002 | 80.7       | 85.0   | 77.6  | 75.2    | 82.4      | 79.7  | 80.0  |
| 2003 | 87.8       | 87.5   | 87.7  | 85.3    | 86.3      | 86.3  | 82.6  |
| 2004 | 87.1       | 86.3   | 86.9  | 85.6    | 84.4      | 85.7  | 85.7  |
| 2005 | 85.0       | 86.4   | 86.6  | 82.2    | 85.9      | 85.8  | 85.8  |
| 2006 | 85.8       | 86.5   | 85.3  | 85.8    | 85.6      | 85.5  | 87.0  |
| 2007 | 85.1       | 85.0   | 83.5  | 85.9    | 86.3      | 84.9  | 86.5  |
| 2008 | 86.8       | 84.5   | 84.8  | 85.3    | 86.3      | 85.6  | 86.7  |
| 2009 | 87.0       | 86.7   | 87.2  | 84.8    | 87.1      | 85.5  | 86.9  |
| 2010 | 86.2       | 80.4   | 86.9  | 83.8    | 86.6      | 85.4  | 83.8  |
| 2011 | 83.6       | 85.5   | 85.3  | 84.8    | 88.2      | 85.4  | 85.7  |
| 2012 | 85.9       | 83.7   | 83.3  | 85.2    | 85.8      | 85.6  | 85.3  |
| 2013 | 86.4       | 85.3   | 86.4  | 83.8    | 85.6      | 85.0  | 86.4  |
| 2014 | 81.9       | 79.9   | 82.5  | 81.2    | 77.9      | 85.1  | 79.1  |
| 2015 | 85.6       | 82.1   | 85.1  | 80.4    | 83.7      | 85.2  | 83.9  |
| 2016 | 82.2       | 82.4   | 85.2  | 80.8    | 81.5      | 82.7  | 82.6  |
| 2017 | 80.8       | 82.3   | 83.2  | 78.9    | 82.6      | 83.7  | 80.4  |
| 2018 | 81.6       | 81.8   | 84.8  | 78.1    | 81.1      | 81.5  | 84.7  |

Some parts of Kara may have started receiving ivermectin MDA in 1988-1990 [4]. Coverage data from [4,8].



**Table S32. Reported coverage (% of total population) of ivermectin MDA for 1991-2018 in Centrale**

| Year | Prefecture |           |         |           |
|------|------------|-----------|---------|-----------|
|      | Blitta     | Sotouboua | Tchamba | Tchaoudjo |
| 1991 | 62.8       | 59.3      | 62.1    | 57.6      |
| 1992 | 73.1       | NA        | NA      | NA        |
| 1993 | 67.2       | 67.4      | 69.3    | 71.7      |
| 1994 | 58.6       | 54.8      | 59.8    | 58.5      |
| 1995 | 75.9       | 68.9      | 84.1    | 81.7      |
| 1996 | 82.6       | 81.5      | 87.9    | 86.8      |
| 1997 | 0          | 0         | 0       | 0         |
| 1998 | NA         | NA        | NA      | NA        |
| 1999 | NA         | NA        | NA      | NA        |
| 2000 | 73.7       | 72.1      | 75.4    | 68.5      |
| 2001 | 77.1       | 72.2      | 72.5    | 73.1      |
| 2002 | 76.3       | 72.2      | 72.9    | 75.8      |
| 2003 | 82.0       | 82.5      | 82.3    | 85.9      |
| 2004 | 83.3       | 84.0      | 85.8    | 86.4      |
| 2005 | 84.5       | 85.3      | 81.9    | 85.2      |
| 2006 | 85.8       | 79.4      | 84.0    | 84.5      |
| 2007 | 88.7       | 82.4      | 87.3    | 85.5      |
| 2008 | 88.3       | 86.1      | 86.6    | 85.7      |
| 2009 | 88.3       | 85.8      | 86.8    | 85.8      |
| 2010 | 86.4       | 81.8      | 80.1    | 84.2      |
| 2011 | 87.1       | 86.1      | 75.7    | 84.6      |
| 2012 | 85.2       | 59.4      | 89.3    | 84.7      |
| 2013 | 89.5       | 83.4      | 82.3    | 85.2      |
| 2014 | 76.6       | 83.6      | 74.5    | 80.3      |
| 2015 | 86.4       | 84.0      | 82.8    | 85.5      |
| 2016 | 84.4       | 84.0      | 82.6    | 84.6      |
| 2017 | 86.4       | 84.9      | 81.9    | 83.5      |
| 2018 | 82.5       | 85.8      | NA      | 88.7      |

Coverage data from [4,8].

**Table S33. Reported coverage (% of total population) of ivermectin MDA for 1991-2018 in Plateaux**

| Year | Prefecture |        |      |      |       |          |      |       |       |            |      |      |
|------|------------|--------|------|------|-------|----------|------|-------|-------|------------|------|------|
|      | Agou       | Akébou | Amou | Anié | Danyi | Est-Mono | Haho | Kloto | Kpélé | Moyen-Mono | Ogou | Wawa |
| 1991 | 41.3       | 0      | 0    | 51.5 | 0     | 54.3     | 0    | 0     | 0     | 0          | 54.1 | 0    |
| 1992 | NA         | 0      | 59.3 | NA   | 0     | 73.3     | 0    | 0     | 0     | 0          | 66.0 | 91.3 |
| 1993 | 46.2       | 62.9   | 57.5 | 64.8 | 62.8  | 66.8     | 55.7 | 70.7  | 64.3  | 66.0       | 58.8 | 62.7 |
| 1994 | 72.1       | 65.7   | 59.7 | 45.4 | 67.7  | 58.2     | 68.1 | 75.0  | 74.7  | 60.3       | 60.7 | 64.9 |
| 1995 | 71.5       | NA     | 76.4 | 69.7 | 83.9  | 79.0     | 73.0 | 63.0  | NA    | 76.7       | 75.1 | 78.2 |
| 1996 | 78.2       | 81.6   | 80.7 | 80.8 | 90.4  | 80.5     | 19.1 | 74.2  | NA    | NA         | 80.0 | 75.8 |
| 1997 | 0          | 0      | 0    | 0    | 0     | 0        | 0    | 0     | 0     | 0          | 0    | 0    |
| 1998 | NA         | NA     | NA   | NA   | NA    | NA       | NA   | NA    | NA    | NA         | NA   | NA   |
| 1999 | NA         | NA     | NA   | NA   | NA    | NA       | NA   | NA    | NA    | NA         | NA   | NA   |
| 2000 | 53.7       | NA     | 67.1 | 70.1 | 63.4  | 47.5     | 71.8 | 67.7  | NA    | 71.0       | 55.4 | 62.4 |
| 2001 | 56.5       | 74.3   | 68.9 | NA   | 73.3  | 50.6     | 68.3 | 73.3  | 76.5  | 77.1       | 65.6 | 58.1 |
| 2002 | 74.0       | NA     | 73.8 | NA   | 75.2  | 72.8     | 78.8 | 76.9  | NA    | 73.7       | 76.1 | 73.6 |
| 2003 | 79.9       | NA     | 77.9 | NA   | 78.7  | 74.9     | 79.9 | 81.4  | NA    | 80.5       | 74.0 | 70.9 |
| 2004 | 85.0       | NA     | 81.4 | NA   | 81.3  | 80.3     | 81.1 | 86.0  | NA    | 85.1       | 84.1 | 80.7 |
| 2005 | 85.1       | NA     | 85.9 | NA   | 84.5  | 84.2     | 83.2 | 86.0  | NA    | 85.5       | 83.1 | 81.1 |
| 2006 | 84.9       | NA     | 85.1 | NA   | 85.1  | 85.4     | 85.1 | 85.7  | NA    | 85.6       | 83.7 | 85.5 |
| 2007 | 85.2       | NA     | 85.6 | NA   | 85.4  | 83.7     | 85.2 | 85.3  | NA    | 84.2       | 85.6 | 85.2 |
| 2008 | 85.2       | NA     | 85.4 | NA   | 85.3  | 85.2     | 85.8 | 85.7  | NA    | 86.0       | 87.0 | 84.8 |
| 2009 | 85.5       | NA     | 86.9 | NA   | 84.8  | 85.7     | 86.0 | 85.9  | NA    | 88.1       | 85.2 | 85.3 |
| 2010 | 86.6       | NA     | 85.7 | NA   | 85.8  | 85.0     | 86.5 | 86.0  | NA    | 85.7       | 85.3 | 85.1 |
| 2011 | 81.5       | NA     | 84.5 | NA   | 83.0  | 78.2     | 79.1 | 84.0  | NA    | 81.5       | 83.8 | 80.5 |
| 2012 | 89.1       | NA     | 84.2 | NA   | 82.7  | 81.1     | 79.4 | 83.4  | NA    | 84.8       | 82.2 | 81.2 |
| 2013 | 85.0       | 79.9   | 81.7 | 84.1 | 82.5  | 82.1     | 82.6 | 84.0  | 84.1  | 83.6       | 84.1 | 80.2 |
| 2014 | 93.0       | 83.7   | 81.0 | 84.7 | 82.9  | 80.4     | 83.8 | 82.6  | 83.6  | 82.6       | 82.4 | 69.8 |
| 2015 | 83.9       | 82.4   | 81.4 | 83.6 | 84.4  | 76.7     | 85.0 | 84.7  | 84.3  | 82.3       | 78.3 | 80.6 |
| 2016 | 84.0       | 85.3   | 83.5 | 82.7 | 83.9  | 81.1     | 84.0 | 85.4  | 85.8  | 83.0       | 82.4 | 85.3 |
| 2017 | 84.4       | 85.8   | 79.5 | 77.5 | 86.2  | 82.2     | 83.8 | 84.8  | 85.5  | 82.0       | 82.4 | 85.4 |
| 2018 | NA         | NA     | 79.8 | NA   | 86.0  | NA       | 85.7 | 87.5  | NA    | NA         | 83.3 | NA   |

Coverage data from [4,8].

**Table S34. Reported coverage (% of total population) of ivermectin MDA for 1991-2018 in Maritime**

| Year | Prefecture |          |       |      |    |      |      |
|------|------------|----------|-------|------|----|------|------|
|      | Avé        | Bas-Mono | Golfe | Lacs | Vo | Yoto | Zio  |
| 1991 | 0          | 0        | 0     | 0    | NA | 0    | 0    |
| 1992 | 0          | 0        | 0     | 0    | NA | 0    | 0    |
| 1993 | 68.6       | 69.6     | 65.8  | 85.7 | NA | 63.7 | 61.4 |
| 1994 | 57.3       | 59.3     | 47.5  | 62.7 | NA | 59.8 | 70.7 |
| 1995 | NA         | 75.6     | 80.4  | NA   | NA | NA   | 72.3 |
| 1996 | NA         | 74.8     | 83.5  | NA   | NA | 19.1 | 70.8 |
| 1997 | 0          | 0        | 0     | 0    | NA | 0    | 0    |
| 1998 | NA         | NA       | NA    | NA   | NA | NA   | NA   |
| 1999 | NA         | NA       | NA    | NA   | NA | NA   | NA   |
| 2000 | 65.2       | 72.0     | NA    | NA   | NA | 60.8 | 64.3 |
| 2001 | 62.7       | 74.0     | 75.3  | 85.8 | NA | 64.1 | 76.6 |
| 2002 | 79.6       | NA       | NA    | 76.5 | NA | 79.5 | 80.2 |
| 2003 | 78.3       | NA       | NA    | 74.2 | NA | 81.4 | 85.3 |
| 2004 | 86.7       | NA       | NA    | 86.5 | NA | 89.2 | 85.3 |
| 2005 | 86.1       | NA       | NA    | 87.2 | NA | 88.4 | 85.4 |
| 2006 | 86.7       | NA       | NA    | 88.9 | NA | 85.8 | 85.4 |
| 2007 | 82.8       | NA       | NA    | 82.7 | NA | 80.4 | 85.6 |
| 2008 | 85.5       | NA       | NA    | 84.5 | NA | 86.7 | 85.4 |
| 2009 | 87.6       | NA       | NA    | 88.0 | NA | 86.2 | 85.5 |
| 2010 | 85.9       | NA       | NA    | 87.0 | NA | 87.9 | 85.3 |
| 2011 | 84.1       | NA       | NA    | 82.0 | NA | 78.7 | 84.6 |
| 2012 | 58.0       | NA       | NA    | 82.8 | NA | 85.8 | 77.8 |
| 2013 | 85.7       | 83.6     | NA    | NA   | NA | 84.6 | 81.8 |
| 2014 | 82.8       | 79.1     | NA    | NA   | NA | 81.7 | 78.3 |
| 2015 | 84.0       | 83.0     | NA    | NA   | NA | 81.6 | 81.7 |
| 2016 | 84.1       | 84.9     | 2.4   | NA   | NA | 80.8 | 81.7 |
| 2017 | NA         | 0        | NA    | NA   | NA | NA   | NA   |
| 2018 | NA         | 0        | NA    | NA   | NA | NA   | NA   |

Coverage data from [4,8].

## Supplementary references

1. World Health Organization, Onchocerciasis Control Programme in the Volta River Basin Area & Brinkmann UK. Baseline data on the epidemiology of onchocerciasis in Northern Togo. Onchocerciasis Control Programme in the Volta River Basin Area. **1977**. Available at: <https://iris.who.int/handle/10665/339680>. Accessed 21 March 2025.
2. World Health Organization, United Nations Development Programme, Food and Agriculture Organization of the United Nations & International Bank for Reconstruction and Development. Onchocerciasis control in the Volta river basin area: report of the mission for preparatory assistance to the governments of Dahomey, Ghana, Ivory Coast, Mali, Niger, Togo and Upper Volta. **1973**. World Health Organization. Available at: <https://iris.who.int/handle/10665/277239>. Accessed 21 March 2025.
3. Boatin B, Molyneux DH, Hougard JM, et al. Patterns of epidemiology and control of onchocerciasis in west Africa. *J Helminthol* **1997**; 71:91–101.
4. Komlan K, Vossberg PS, Gantin RG, et al. *Onchocerca volvulus* infection and serological prevalence, ocular onchocerciasis and parasite transmission in northern and central Togo after decades of *Simulium damnosum* s.l. vector control and mass drug administration of ivermectin. *PLoS Negl Trop Dis* **2018**; 12:e0006312.
5. World Health Organization, African Programme for Onchocerciasis Control. Progress report of the special intervention zones of the ex-OCP, January - August 2006. Dar-es-Salaam, Tanzania 5-8 December 2006. African Programme for Onchocerciasis Control, **2006**. Available at: <https://iris.who.int/handle/10665/275951>. Accessed 21 March 2025.
6. Johanns SI, Gantin RG, Wangala B, et al. *Onchocerca volvulus*-specific antibody and cellular responses in onchocerciasis patients treated annually with ivermectin for 30 years and exposed to parasite transmission in central Togo. *PLoS Negl Trop Dis* **2022**; 16:e0010340.
7. Katholi CR, Toé L, Merriweather A, Unnasch TR. Determining the prevalence of *Onchocerca volvulus* infection in vector populations by polymerase chain reaction screening of pools of black flies. *J Infect Dis* **1995**; 172:1414–47.
8. Vinkeles Melchers NVS, Agoro S, Togbey K, et al. Impact of ivermectin and vector control on onchocerciasis transmission in Togo: Assessing the empirical evidence on trends in infection and entomological indicators. *PLoS Negl Trop Dis* **2024**; 18:e0012312.
9. Post RJ, Cheke RA, Boakye DA, et al. Stability and change in the distribution of cytospecies of the *Simulium damnosum* complex (Diptera: Simuliidae) in southern Ghana from 1971 to 2011. *Parasit Vectors* **2013**; 6:205.
10. Lamberton PHL, Cheke RA, Walker M, et al. Onchocerciasis transmission in Ghana: biting and parous rates of host-seeking sibling species of the *Simulium damnosum* complex. *Parasit Vectors* **2014**; 7:511.
11. Cheke RA, Fiasorgbor GK, Walsh JF, Yameogo L. Elimination of the Djodji form of the blackfly *Simulium sanctipauli sensu stricto* as a result of larviciding by the WHO Onchocerciasis Control Programme in West Africa. *Med Vet Entomol* **2008**; 22:172–74.

12. Onchocerciasis Control Programme in West Africa (Joint Programme Committee). Progress Report of the World Health Organization for 1998 (1 September 1997 - 31 August 1998). Available at: <https://iris.who.int/bitstream/handle/10665/311230/JPC19.2-eng.pdf?sequence=1>. Accessed 21 March 2025.
13. Organisation Mondiale de la Santé, Programme Africain de Lutte contre l'Onchocercose, Badila C. Initiation aux techniques de lutte contre l'onchocercose: application des techniques d'épandage de larvicides, d'évaluation entomologique, des techniques d'évaluation épidémiologique et de traitement à l'ivermectine. Rapport de stage dans les Zones d'Interventions Spéciales (SIZ) de lutte contre l'onchocercose au Togo et au Bénin, 4 août - 14 décembre 2003. Ouagadougou: Programme Africain de Lutte contre l'Onchocercose, **2003**. Available at: <https://iris.who.int/handle/10665/367599>. Accessed 21 March 2025.
14. Korbmacher F, Komlan K, Gantin RG, et al. *Mansonella perstans*, *Onchocerca volvulus* and *Strongyloides stercoralis* infections in rural populations in central and southern Togo. *Parasite Epidemiol Control* **2018**; 3:77–87.
15. USAID, Act to End NTDs West, FHI 360, Health and Development International. Act to End Neglected Tropical Diseases | West - FY 2023 Work plan-Togo (October 1, 2022-September 30, 2023), **2023**. Available at: <https://www.actntdswest.org/sites/default/files/inline-files/Act%20West%20FY23%20Workplan-Togo.pdf>. Accessed 21 March 2025.
